# Supplementary material for: A Functional Polymorphism Downstream of Vitamin A Regulator Gene CYP26B1 Is Associated with Hand Osteoarthritis
Source: MDPI journal article supplement (doi:10.3390/ijms24033021), 2023-02-03
Supplement: s1 [file s1]

**A**

rs12713768: C>A

|                              |     |               |                                               |                              |
|------------------------------|-----|---------------|-----------------------------------------------|------------------------------|
| <i>Homo sapiens</i>          | 87  | GAAACCACTCAGG | CCCTGGCCAGGTTCTCCTGTC                         | AACAGGCCAGCCTGAGACAGTCCA     |
| <i>Pan troglodytes</i>       | 87  | GAAACCACTCAGG | CCCTGGCCAGGTTCTCCTGTC                         | AACAGGCCAGCCTGAGACAGTCCA     |
| <i>Gorilla gorilla</i>       | 87  | GAAACCACTCAGG | CCCTGGCCAGGTTCTCCTGTC                         | AACAGGCCAGCCTGAGACAGTCCA     |
| <i>Macaca mulatta</i>        | 116 | AGCACACTCT    | CCCTCCCTCCATCTGTCTGACTAATAGTCCCTTCTGCAA       |                              |
| <i>Papio anubis</i>          | 87  | GAAACCACTCAGG | CCCTGGCCAGGTTCTCCTGTC                         | AACAGGCCAGCCTGAGACAGTCCA     |
| <i>Pongo abelii</i>          | 116 | AGCACACTCT    | CCCTCCCTCCATCTGTCTGACTAATAGTCCCTTCTGCAA       |                              |
| <i>Chlorocebus sabaeus</i>   | 116 | AGCACACTCT    | CCCTCCCTCCATCTGTCTGACTAATAGTCCCTTCTGCAA       |                              |
| <i>Callithrix jacchus</i>    | 87  | GAAACCACTC    | GGCCCTGGCCAGGTTCTCCTGTC                       | AACAGGCCAGCCTGAGACAGTCCA     |
| <i>Sus scrofa</i>            | 102 | AGCACACTCT    | CCCTCCCTCCATCTGTCTGACTAATAGTCCCTTCTGCGA       |                              |
| <i>Felis catus</i>           | 72  | GAAACCACTGAGG | CCCTGGCTAGGTTCTCCCTCAGGAATGGCCAGCCGCAAGGCTCCA |                              |
| <i>Mus musculus</i>          | 73  | GAAACCACTCAGG | CTGGCCAGGTTCTTTTGGCAAATAGGCCAGCCG             |                              |
| <i>Ovis aries</i>            | 88  | GAAACCTCTTGGG | CCCTGGCAGGTTTCCACCAAAACAGGCCACTCTGTGAGGCTCTG  |                              |
| <i>Oryctolagus cuniculus</i> | 69  | AGCACACTCT    | CTCTCCTTCCGTCTGTCTGAC                         | CAGATTCCATGGCAA              |
| <i>Rattus norvegicus</i>     | 90  | GAAACCACTCAGG | CTGGCCAGGTTCTTTTGGGC                          | CACAGGCCAGC                  |
| <i>Equus caballus</i>        | 116 | AGCACACTCT    | CTCTCCCTTCATCTGCCTGACTAATGTTCCCATTTGCAA       |                              |
| <i>Canis familiaris</i>      | 118 | AGCACGTCTCT   | CCCTCCC                                       | TCTCTCTGACTAATGTTTCCATCTGTGA |
| <i>Bos taurus</i>            | 117 | AGCACACTCT    | CCCTCCTCTGTCTGTCTGACTAATGCTCCCATTAAGCAA       |                              |
| consensus                    | 121 | gaaACcatCT    | ggCcCtggc aggTttttctgaC                       | aAtaggcCagcctg ga            |

**B**

| Organism                     | Chr | Identity <sup>a</sup> | Distance (bp) <sup>b</sup> | Gene <sup>c</sup> | Location <sup>d</sup>         | Accession   |
|------------------------------|-----|-----------------------|----------------------------|-------------------|-------------------------------|-------------|
| <i>Pan troglodytes</i>       | 2A  | 100%                  | 118532                     | LOC738157         | Chr2A: 72,283,693-72,302,973  | NC_036880.1 |
| <i>Gorilla gorilla</i>       | 2A  | 99.50%                | 118598                     | LOC101126229      | Chr2A: 88,488,277-88,506,890  | NC_044603.1 |
| <i>Macaca mulatta</i>        | 13  | 98.51%                | 104361                     | LOC704750         | Chr13: 36,656,295-36,675,586  | NC_041766.1 |
| <i>Papio anubis</i>          | 14  | 98.51%                | 104537                     | CYP26B1           | Chr14: 72,460,531-72,479,135  | NC_044989.1 |
| <i>Pongo abelii</i>          | 2A  | 98.01%                | 105239                     | LOC100446166      | Chr2A: 36,432,062-36,452,148  | NC_036904.1 |
| <i>Chlorocebus sabaeus</i>   | 14  | 96.52%                | 97379                      | CYP26B1           | Chr14: 35,030,011-35,057,164  | NC_023655.1 |
| <i>Callithrix jacchus</i>    | 14  | 94.55%                | 106747                     | CYP26B1           | Chr14: 37,259,670-37,279,488  | NC_048396.1 |
| <i>Sus scrofa</i>            | 3   | 82.21%                | 104699                     | LOC100521659      | Chr3: 70,573,551-70,593,416   | NC_010445.4 |
| <i>Felis catus</i>           | A3  | 80.85%                | 81186                      | CYP26B1           | ChrA3: 91,168,443-91,189,206  | NC_018725.3 |
| <i>Mus musculus</i>          | 6   | 80.83%                | 82692                      | CYP26B1           | Chr6: 84,548,396-84,570,890   | NC_000072.7 |
| <i>Ovis aries</i>            | 3   | 78.43%                | 128627                     | LOC101110922      | Chr3: 100,383,775-100,400,597 | NC_040254.1 |
| <i>Oryctolagus cuniculus</i> | 2   | 78.06%                | 89698                      | LOC100341926      | Chr2: 114,279,277-114,297,359 | NC_013670.1 |
| <i>Rattus norvegicus</i>     | 4   | 77.61%                | 94475                      | CYP26B1           | Chr4: 116,261,796-116,278,615 | NC_005103.4 |
| <i>Equus caballus</i>        | 15  | 76.96%                | 97426                      | CYP26B1           | Chr15: 31,695,380-31,715,089  | NC_009158.3 |
| <i>Canis familiaris</i>      | 17  | 74.76%                | 78225                      | CYP26B1           | Chr17: 50,633,397-50,653,882  | NC_006599.3 |
| <i>Bos taurus</i>            | 11  | 74.61%                | 116041                     | CYP26B1           | Chr11: 12,371,161-12,396,520  | NC_037338.1 |

Chr, chromosome.

<sup>a</sup>similarity retrieved from 100bp flanking sequences up- and downstream of SNP rs12713768 compared to human

<sup>b</sup>distance from C allele of rs12713768 to the coding sequence of CYP26B1 gene

<sup>c</sup>name of CYP26B1 gene in each organism retrieved from NCBI

<sup>d</sup>position of CYP26B1 gene in each organism

Supplementary Figure S3. The risk-conferring C allele of SNP rs12713768 is **A** conserved and **B** located within 150kb from gene CYP26B1 across 16 mammalian genomes.
