# Supplementary material for: A Functional Polymorphism Downstream of Vitamin A Regulator Gene CYP26B1 Is Associated with Hand Osteoarthritis
Source: MDPI journal article supplement (doi:10.3390/ijms24033021), 2023-02-03
Supplement: s1 [file s1]

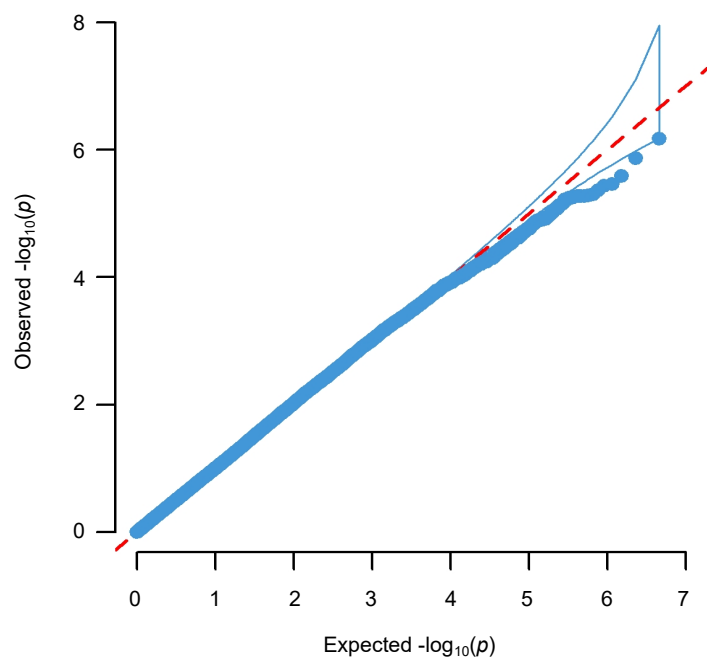

Supplementary Figure S2. Quantile-quantile plot of the observed  $P$ -values versus the expected null  $P$ -values distribution. The Q-Q plot was constructed after stringent QC analysis and imputation of 4,587,241 SNPs.
