# Supplementary material for: A Functional Polymorphism Downstream of Vitamin A Regulator Gene CYP26B1 Is Associated with Hand Osteoarthritis
Source: Int J Mol Sci. 2023 Feb 3;24(3):3021. doi: 10.3390/ijms24033021 (PMC9918232; doi:10.3390/ijms24033021)
Supplement: Supplementary file 1 [file ijms-24-03021-s001.zip]

Archive with 4 entries (4 files):
- Supplementary Figure S1.pdf
- Supplementary Figure S2.pdf
- Supplementary Figure S3.pdf
- Supplementary Tables S1-S11.xlsx
