# Supplementary material for: A Functional Polymorphism Downstream of Vitamin A Regulator Gene CYP26B1 Is Associated with Hand Osteoarthritis
Source: Int J Mol Sci. 2023 Feb 3;24(3):3021. doi: 10.3390/ijms24033021 (PMC9918232; doi:10.3390/ijms24033021)
Supplement: Supplementary file 1 [file ijms-24-03021-s001.zip › Supplementary Tables S1-S11.xlsx]

## Sheet: Title
A functional polymorphism downstream of vitamin A regulator gene CYP26B1 is associated with hand osteoarthritis
International Journal of Molecular Sciences
Vivia Khosasih1,2,25, Kai-Ming Liu2,25, Chung-Ming Huang3,4,25, Lieh-Bang Liou5,6, Ming-Shium Hsieh7,8,9, Chian-Her Lee7,8, Chang-Youh Tsai10,11, San-Yuan Kuo12, Su-Yang Hwa13, Chia-Li Yu14,15, Chih-Hao Chang16,17, Cheng-Jyh Lin18, Song-Chou Hsieh19, Chun-Ying Cheng6,20, Wei-Ming Chen10,21, Liang-Kuang Chen22, Hui-Ping Chuang2, Ying-Ting Chen2, Pei-Chun Tsai2, Liang-Suei Lu2, Weng-Siong H'ng2, Ya…
1Taiwan International Graduate Program in Molecular Medicine, National Yang Ming Chiao Tung University and Academia Sinica, Taipei, Taiwan
2National Center for Genome Medicine, Institute of Biomedical Sciences, Academia Sinica, Taipei, Taiwan
3Division of Immunology and Rheumatology, Department of Internal Medicine, China Medical University Hospital, Taichung, Taiwan
4Graduate Institute of Integrated Medicine, College of Chinese Medicine, China Medical University, Taichung, Taiwan
5Division of Rheumatology, Allergy, and Immunology, New Taipei Municipal Tucheng Hospital, New Taipei City, Taiwan
6College of Medicine, Chang Gung University, Taoyuan, Taiwan
7Department of Orthopedics, School of Medicine, College of Medicine, Taipei Medical University, Taipei, Taiwan
8Department of Orthopedics, Taipei Medical University Hospital, Taipei, Taiwan
9Department of Orthopedics, En Chu Kong Hospital, New Taipei, Taiwan
10School of Medicine, National Yang Ming Chiao Tung University, Taipei, Taiwan
11Division of Allergy, Immunology, and Rheumatology, Department of Medicine, Taipei Veterans General Hospital, Taipei, Taiwan
12Division of Rheumatology, Immunology, and Allergy, Department of Internal Medicine, Tri-Service General Hospital, National Defense Medical Center, Taipei, Taiwan
13Department of Orthopaedics, Tri-Service General Hospital and National Defense Medical Center, Taipei, Taiwan
14Department of Internal Medicine, National Taiwan University Hospital, Taipei, Taiwan
15Institute of Molecular Medicine, College of Medicine, National Taiwan University, Taipei, Taiwan
16Department of Orthopedics, College of Medicine, National Taiwan University and National Taiwan University Hospital, Taipei, Taiwan
17Department of Orthopedics, National Taiwan University Hospital Jin-Shan Branch, New Taipei City, Taiwan
18Department of Orthopedics, China Medical University Hospital, Taichung, Taiwan
19Division of Allergy, Immunology, and Rheumatology, Department of Internal Medicine, National Taiwan University Hospital, Taipei, Taiwan
20Department of Orthopedic, Chang Gung Memorial Hospital, Linkou, Taoyuan, Taiwan
21Department of Orthopaedics and Traumatology, Taipei Veteran General Hospital, Taipei, Taiwan
22Department of Diagnostic Radiology, Shin Kong Wu Ho-Su Memorial Hospital, Taipei, Taiwan
23Genomic Medicine Institute, Geisinger, Danville, PA, USA
24School of Chinese Medicine, China Medical University, Taichung, Taiwan
25These authors contributed equally
#Current Address: Galatea Bio, Inc., FL, USA
*Address correspondence and reprint request to: Jer-Yuarn Wu (J.-Y.W.) and Ming Ta Michael Lee (M.T.M.L.). Address: Institute of Biomedical Sciences, No. 128, Section 2, Academia Rd, Nangang District, Taipei City 115, Taiwan. Phone: (02)-27899075. Fax: (02)-27824066. Email: jywu@ibms.sinica.edu.tw (J.-Y.W.); Address: Galatea Bio, Inc., Hialeah, FL 33010, USA. Email: michael.lee@galatea.bio (M.T.M…

## Sheet: Table S1
Table S1. Geisinger hand OA criteria
ICD	Description	Version
Hand OA Case inclusion codes
715.04	Osteoarthrosis, generalized, hand	9
715.14	Osteoarthrosis, localized, primary, hand	9
715.34	Unspec. localised osteoarthrosis/allied dis. (hand)	9
712.84	Other specified crystal arthropathies (hand)	9
712.94	Unspecified crystal arthropathy (hand)	9
M18.0	Arthrosis of first carpometacarpal joint	10
M18.9	Arthrosis of first carpometacarpal joint, unspecified	10
M18.10	Other primary arthrosis of first carpometacarpal joint	10
M18.11	Unilateral primary osteoarthritis of first carpometacarpal joint, right hand	10
M18.12	Unilateral primary osteoarthritis of first carpometacarpal joint, left hand	10
M19.041	Primary osteoarthritis, right hand	10
M19.042	Primary osteoarthritis, left hand	10
M19.049	Primary osteoarthritis, unspecified hand	10
M15.1	Heberden's nodes (with arthropathy)	10
M15.2	Bouchard's nodes (with arthropathy)	10
Control exclusion codes
712	712 Crystal arthropathies	9
712.1	712.1 Chondrocalcinosis due to dicalcium phosphate crystals	9
712.2	712.2 Chondrocalcinosis due to pyrophosphate crystals	9
712.3	"712.3 Chondrocalcinosis, unspecified"	9
712.8	712.8 Other specified crystal arthropathies	9
712.8	712.80 Other specified crystal arthropathies (multiple sites)	9
712.81	712.81 Other specified crystal arthropathies (shoulder region)	9
712.82	712.82 Other specified crystal arthropathies (upper arm)	9
712.83	712.83 Other specified crystal arthropathies (forearm)	9
712.84	712.84 Other specified crystal arthropathies (hand)	9
712.85	712.85 Other specified crystal arthropathies (pelvic region and thigh)	9
712.86	712.86 Other specified crystal arthropathies (lower leg)	9
712.87	712.87 Other specified crystal arthropathies (ankle and foot)	9
712.88	712.88 Other specified crystal arthropathies (other specified site)	9
712.89	712.89 Other specified crystal arthropathies (site unspecified)	9
712.9	712.9 Unspecified crystal arthropathy	9
712.9	712.90 Unspecified crystal arthropathy (multiple sites)	9
712.91	712.91 Unspecified crystal arthropathy (shoulder region)	9
712.92	712.92 Unspecified crystal arthropathy (upper arm)	9
712.93	712.93 Unspecified crystal arthropathy (forearm)	9
712.94	712.94 Unspecified crystal arthropathy (hand)	9
712.95	712.95 Unspecified crystal arthropathy (pelvic region and thigh)	9
712.96	712.96 Unspecified crystal arthropathy (lower leg)	9
712.97	712.97 Unspecified crystal arthropathy (ankle and foot)	9
712.98	712.98 Unspecified crystal arthropathy (other specified site)	9
712.99	712.99 Unspecified crystal arthropathy (site unspecified)	9
715	715 Osteoarthrosis and allied disorders	9
715	715.0 Generalized osteoarthrosis and allied disorders	9
715.1	"715.1 Localised, primary osteoarthrosis and allied disorders"	9
715.1	"715.10 Localised, primary osteoarthrosis and allied disorders (multiple sites)"	9
715.11	"715.11 Localised, primary osteoarthrosis and allied disorders (shoulder region)"	9
715.12	"715.12 Localised, primary osteoarthrosis and allied disorders (upper arm)"	9
715.13	"715.13 Localised, primary osteoarthrosis and allied disorders (forearm)"	9
715.14	"715.14 Localised, primary osteoarthrosis and allied disorders (hand)"	9
715.15	715.15 Localised prim. osteoarthrosis/allied dis. (pelvic region and thigh)	9
715.16	"715.16 Localised, primary osteoarthrosis and allied disorders (lower leg)"	9
715.17	"715.17 Localised, primary osteoarthrosis and allied disorders (ankle and foot)"	9
715.18	"715.18 Localised, prim. osteoarthrosis/allied dis. (other specified site)"	9
715.19	"715.19 Localised, primary osteoarthrosis and allied disorders (site unspecified)"	9
715.2	"715.2 Localised, secondary osteoarthritis and allied disorders"	9
715.2	"715.20 Localised, secondary osteoarthrosis and allied disorders (multiple sites)"	9
715.21	"715.21 Localised, secondary osteoarthrosis and allied disorders (shoulder region)"	9
715.22	"715.22 Localised, secondary osteoarthrosis and allied disorders (upper arm)"	9
715.23	"715.23 Localised, secondary osteoarthrosis and allied disorders (forearm)"	9
715.24	"715.24 Localised, secondary osteoarthrosis and allied disorders (hand)"	9
715.25	"715.25 Localised, second. osteoarthrosis/allied dis. (pelvic region and thigh)"	9
715.26	"715.26 Localised, secondary osteoarthrosis and allied disorders (lower leg)"	9
715.27	"715.27 Localised, secondary osteoarthrosis and allied disorders (ankle and foot)"	9
715.28	715.28 Localised second. osteoarthrosis/allied dis. (other specified site)	9
715.29	715.29 Localised second. osteoarthrosis/allied dis. (unspecified site)	9
715.3	715.3 Unspecified localised osteoarthritis and allied disorders	9
715.3	715.30 Unspec. localised osteoarthrosis/allied dis. (multiple sites)	9
715.31	715.31 Unspec. localised osteoarthrosis/allied dis. (shoulder region)	9
715.32	715.32 Unspec. localised osteoarthrosis/allied dis. (upper arm)	9
715.33	715.33 Unspec. localised osteoarthrosis/allied dis. (forearm)	9
715.34	715.34 Unspec. localised osteoarthrosis/allied dis. (hand)	9
715.35	715.35 Unspec. localised osteoarthrosis/allied dis. (pelvic region and thigh)	9
715.36	715.36 Unspec. localised osteoarthrosis/allied dis. (lower leg)	9
715.37	715.37 Unspec. localised osteoarthrosis/allied dis. (ankle and foot)	9
715.38	715.38 Unspec. localised osteoarthrosis/allied dis. (other specified site)	9
715.39	715.39 Unspec. localised osteoarthrosis/allied dis. (unspecified site)	9
715.8	715.8 Osteoarthrosis/allied dis. more than one site but not generalized	9
715.9	715.9 Osteoarthrosis/allied dis. not spec. whether gen. or loc.	9
716.1	716.1 Traumatic arthropathy	9
716.1	716.10 Traumatic arthropathy (multiple sites)	9
716.11	716.11 Traumatic arthropathy (shoulder region)	9
716.12	716.12 Traumatic arthropathy (upper arm)	9
716.13	716.13 Traumatic arthropathy (forearm)	9
716.14	716.14 Traumatic arthropathy (hand)	9
716.15	716.15 Traumatic arthropathy (pelvic region and thigh)	9
716.16	716.16 Traumatic arthropathy (lower leg)	9
716.17	716.17 Traumatic arthropathy (ankle and foot)	9
716.18	716.18 Traumatic arthropathy (other specified site)	9
716.19	716.19 Traumatic arthropathy (site unspecified)	9
716.5	716.5 Unspecified polyarthropathy or polyarthritis	9
716.5	716.50 Unspecified polyarthropathy or polyarthritis (multiple sites)	9
716.54	716.54 Unspecified polyarthropathy or polyarthritis (hand)	9
716.55	716.55 Unspecified polyarthropathy or polyarthritis (pelvic region and thigh)	9
716.56	716.56 Unspecified polyarthropathy or polyarthritis (lower leg)	9
716.59	716.59 Unspecified polyarthropathy or polyarthritis (site unspecified)	9
716.6	716.6 Unspecified monoarthritis	9
716.6	716.60 Unspecified monoarthritis (multiple sites)	9
716.64	716.64 Unspecified monoarthritis (hand)	9
716.65	716.65 Unspecified monoarthritis (pelvic region and thigh)	9
716.66	716.66 Unspecified monoarthritis (lower leg)	9
716.69	716.69 Unspecified monoarthritis (site unspecified)	9
716.8	716.8 Other specified arthropathy	9
716.8	716.80 Other specified arthropathy (multiple sites)	9
716.81	716.81 Other specified arthropathy (shoulder region)	9
716.82	716.82 Other specified arthropathy (upper arm)	9
716.83	716.83 Other specified arthropathy (forearm)	9
716.84	716.84 Other specified arthropathy (hand)	9
716.85	716.85 Other specified arthropathy (pelvic region and thigh)	9
716.86	716.86 Other specified arthropathy (lower leg)	9
716.87	716.87 Other specified arthropathy (ankle and foot)	9
716.88	716.88 Other specified arthropathy (other specified site)	9
716.89	716.89 Other specified arthropathy (site unspecified)	9
716.9	716.9 Unspecified arthropathy	9
716.9	716.90 Unspecified arthropathy (multiple sites)	9
716.91	716.91 Unspecified arthropathy (shoulder region)	9
716.92	716.92 Unspecified arthropathy (upper arm)	9
716.93	716.93 Unspecified arthropathy (forearm)	9
716.94	716.94 Unspecified arthropathy (hand)	9
716.95	716.95 Unspecified arthropathy (pelvic region and thigh)	9
716.96	716.96 Unspecified arthropathy (lower leg)	9
716.97	716.97 Unspecified arthropathy (ankle and foot)	9
716.98	716.98 Unspecified arthropathy (other specified site)	9
716.99	716.99 Unspecified arthropathy (site unspecified)	9
717	717 Internal derangement of knee	9
717	717.0 Old bucket handle tear of medial meniscus	9
717.1	717.1 Derangement of anterior horn of medial meniscus	9
717.2	717.2 Derangement of posterior horn of medial meniscus	9
717.3	717.3 Other and unspecified derangement of medial meniscus	9
717.4	717.4 Derangement of lateral meniscus	9
717.5	"717.5 Derangement of meniscus, not elsewhere classified"	9
717.6	717.6 Loose body in knee	9
717.8	717.8 Other specified internal derangement of knee	9
717.9	717.9 Unspecified internal derangement of knee	9
718	718 Other derangement of joint	9
718	718.0 Articular cartilage disorder	9
718	718.00 Articular cartilage disorder (multiple sites)	9
718.01	718.01 Articular cartilage disorder (shoulder region)	9
718.02	718.02 Articular cartilage disorder (upper arm)	9
718.03	718.03 Articular cartilage disorder (forearm)	9
718.04	718.04 Articular cartilage disorder (hand)	9
718.05	718.05 Articular cartilage disorder (pelvic region and thigh)	9
718.06	718.06 Articular cartilage disorder (lower leg)	9
718.07	718.07 Articular cartilage disorder (ankle and foot)	9
718.08	718.08 Articular cartilage disorder (other specified site)	9
718.09	718.09 Articular cartilage disorder (site unspecified)	9
718.1	718.1 Loose body in joint	9
718.1	718.10 Loose body in joint (multiple sites)	9
718.11	718.11 Loose body in joint (shoulder region)	9
718.12	718.12 Loose body in joint (upper arm)	9
718.13	718.13 Loose body in joint (forearm)	9
718.14	718.14 Loose body in joint (hand)	9
718.15	718.15 Loose body in joint (pelvic region and thigh)	9
718.16	718.16 Loose body in joint (lower leg)	9
718.17	718.17 Loose body in joint (ankle and foot)	9
718.18	718.18 Loose body in joint (other specified site)	9
718.19	718.19 Loose body in joint (site unspecified)	9
718.2	718.2 Pathological dislocation	9
718.2	718.20 Pathological dislocation (multiple sites)	9
718.21	718.21 Pathological dislocation (shoulder region)	9
718.22	718.22 Pathological dislocation (upper arm)	9
718.23	718.23 Pathological dislocation (forearm)	9
718.24	718.24 Pathological dislocation (hand)	9
718.25	718.25 Pathological dislocation (pelvic region and thigh)	9
718.26	718.26 Pathological dislocation (lower leg)	9
718.27	718.27 Pathological dislocation (ankle and foot)	9
718.28	718.28 Pathological dislocation (other specified site)	9
718.29	718.29 Pathological dislocation (site unspecified)	9
718.3	718.3 Recurrent dislocation of joint	9
718.3	718.30 Recurrent dislocation of joint (multiple sites)	9
718.31	718.31 Recurrent dislocation of joint (shoulder region)	9
718.32	718.32 Recurrent dislocation of joint (upper arm)	9
718.33	718.33 Recurrent dislocation of joint (forearm)	9
718.34	718.34 Recurrent dislocation of joint (hand)	9
718.35	718.35 Recurrent dislocation of joint (pelvic region and thigh)	9
718.36	718.36 Recurrent dislocation of joint (lower leg)	9
718.37	718.37 Recurrent dislocation of joint (ankle and foot)	9
718.38	718.38 Recurrent dislocation of joint (other specified site)	9
718.39	718.39 Recurrent dislocation of joint (site unspecified)	9
718.4	718.4 Contracture of joint	9
718.4	718.40 Contracture of joint (multiple sites)	9
718.41	718.41 Contracture of joint (shoulder region)	9
718.42	718.42 Contracture of joint (upper arm)	9
718.43	718.43 Contracture of joint (forearm)	9
718.44	718.44 Contracture of joint (hand)	9
718.45	718.45 Contracture of joint (pelvic region and thigh)	9
718.46	718.46 Contracture of joint (lower leg)	9
718.47	718.47 Contracture of joint (ankle and foot)	9
718.48	718.48 Contracture of joint (other specified site)	9
718.49	718.49 Contracture of joint (site unspecified)	9
718.5	718.5 Ankylosis of joint	9
718.5	718.50 Ankylosis of joint (multiple sites)	9
718.51	718.51 Ankylosis of joint (shoulder region)	9
718.52	718.52 Ankylosis of joint (upper arm)	9
718.53	718.53 Ankylosis of joint (forearm)	9
718.54	718.54 Ankylosis of joint (hand)	9
718.55	718.55 Ankylosis of joint (pelvic region and thigh)	9
718.56	718.56 Ankylosis of joint (lower leg)	9
718.57	718.57 Ankylosis of joint (ankle and foot)	9
718.58	718.58 Ankylosis of joint (other specified site)	9
718.59	718.59 Ankylosis of joint (site unspecified)	9
718.6	718.6 Unspecified protrusio acetabuli	9
718.6	718.60 Unspecified protrusio acetabuli (multiple sites)	9
718.61	718.61 Unspecified protrusio acetabuli (shoulder region)	9
718.62	718.62 Unspecified protrusio acetabuli (upper arm)	9
718.63	718.63 Unspecified protrusio acetabuli (forearm)	9
718.64	718.64 Unspecified protrusio acetabuli (hand)	9
718.65	718.65 Unspecified protrusio acetabuli (pelvic region and thigh)	9
718.66	718.66 Unspecified protrusio acetabuli (lower leg)	9
718.67	718.67 Unspecified protrusio acetabuli (ankle and foot)	9
718.68	718.68 Unspecified protrusio acetabuli (other specified site)	9
718.69	718.69 Unspecified protrusio acetabuli (site unspecified)	9
718.8	718.8 Other joint derangement not elsewhere classified	9
718.8	718.80 Other joint derangement not elsewhere classified (multiple sites)	9
718.81	718.81 Other joint derangement not elsewhere classified (shoulder region)	9
718.82	718.82 Other joint derangement not elsewhere classified (upper arm)	9
718.83	718.83 Other joint derangement not elsewhere classified (forearm)	9
718.84	718.84 Other joint derangement not elsewhere classified (hand)	9
718.85	718.85 Other joint derangement not elsewhere classified (pelvic region and thigh)	9
718.86	718.86 Other joint derangement not elsewhere classified (lower leg)	9
718.87	718.87 Other joint derangement not elsewhere classified (ankle and foot)	9
718.88	718.88 Other joint derangement not elsewhere classified (other specified site)	9
718.89	718.89 Other joint derangement not elsewhere classified (site unspecified)	9
718.9	718.9 Unspecified derangement of joint	9
718.9	718.90 Unspecified derangement of joint (multiple sites)	9
718.91	718.91 Unspecified derangement of joint (shoulder region)	9
718.92	718.92 Unspecified derangement of joint (upper arm)	9
718.93	718.93 Unspecified derangement of joint (forearm)	9
718.94	718.94 Unspecified derangement of joint (hand)	9
718.95	718.95 Unspecified derangement of joint (pelvic region and thigh)	9
718.96	718.96 Unspecified derangement of joint (lower leg)	9
718.97	718.97 Unspecified derangement of joint (ankle and foot)	9
718.98	718.98 Unspecified derangement of joint (other specified site)	9
718.99	718.99 Unspecified derangement of joint (site unspecified)	9
719.2	719.2 Villonodular synovitis	9
719.2	719.20 Villonodular synovitis (multiple sites)	9
719.21	719.21 Villonodular synovitis (shoulder region)	9
719.22	719.22 Villonodular synovitis (upper arm)	9
719.23	719.23 Villonodular synovitis (forearm)	9
719.24	719.24 Villonodular synovitis (hand)	9
719.25	719.25 Villonodular synovitis (pelvic region and thigh)	9
719.26	719.26 Villonodular synovitis (lower leg)	9
719.27	719.27 Villonodular synovitis (ankle and foot)	9
719.28	719.28 Villonodular synovitis (other specified site)	9
719.29	719.29 Villonodular synovitis (site unspecified)	9
719.4	719.4 Pain in joint	9
719.4	719.40 Pain in joint (multiple sites)	9
719.41	719.41 Pain in joint (shoulder region)	9
719.42	719.42 Pain in joint (upper arm)	9
719.43	719.43 Pain in joint (forearm)	9
719.44	719.44 Pain in joint (hand)	9
719.45	719.45 Pain in joint (pelvic region and thigh)	9
719.46	719.46 Pain in joint (lower leg)	9
719.47	719.47 Pain in joint (ankle and foot)	9
719.48	719.48 Pain in joint (other specified site)	9
719.49	719.49 Pain in joint (site unspecified)	9
719.5	"719.5 Stiffness of joint, not elsewhere classified"	9
719.5	"719.50 Stiffness of joint, not elsewhere classified (multiple sites)"	9
719.51	"719.51 Stiffness of joint, not elsewhere classified (shoulder region)"	9
719.52	"719.52 Stiffness of joint, not elsewhere classified (upper arm)"	9
719.53	"719.53 Stiffness of joint, not elsewhere classified (forearm)"	9
719.54	"719.54 Stiffness of joint, not elsewhere classified (hand)"	9
719.55	"719.55 Stiffness of joint, not elsewhere classified (pelvic region and thigh)"	9
719.56	"719.56 Stiffness of joint, not elsewhere classified (lower leg)"	9
719.57	"719.57 Stiffness of joint, not elsewhere classified (ankle and foot)"	9
719.58	"719.58 Stiffness of joint, not elsewhere classified (other specified site)"	9
719.59	"719.59 Stiffness of joint, not elsewhere classified (site unspecified)"	9
719.6	719.6 Other symptoms referable to joint	9
719.6	719.60 Other symptoms referable to joint (multiple sites)	9
719.61	719.61 Other symptoms referable to joint (shoulder region)	9
719.62	719.62 Other symptoms referable to joint (upper arm)	9
719.63	719.63 Other symptoms referable to joint (forearm)	9
719.64	719.64 Other symptoms referable to joint (hand)	9
719.65	719.65 Other symptoms referable to joint (pelvic region and thigh)	9
719.66	719.66 Other symptoms referable to joint (lower leg)	9
719.67	719.67 Other symptoms referable to joint (ankle and foot)	9
719.68	719.68 Other symptoms referable to joint (other specified site)	9
719.69	719.69 Other symptoms referable to joint (site unspecified)	9
719.7	719.7 Difficulty in walking	9
719.8	719.8 Other specified disorder of joint	9
719.8	719.80 Other specified disorder of joint (multiple sites)	9
719.81	719.81 Other specified disorder of joint (shoulder region)	9
719.82	719.82 Other specified disorder of joint (upper arm)	9
719.83	719.83 Other specified disorder of joint (forearm)	9
719.84	719.84 Other specified disorder of joint (hand)	9
719.85	719.85 Other specified disorder of joint (pelvic region and thigh)	9
719.86	719.86 Other specified disorder of joint (lower leg)	9
719.87	719.87 Other specified disorder of joint (ankle and foot)	9
719.88	719.88 Other specified disorder of joint (other specified site)	9
719.89	719.89 Other specified disorder of joint (site unspecified)	9
719.9	719.9 Unspecified disorder of joint	9
719.9	719.90 Unspecified disorder of joint (multiple sites)	9
719.91	719.91 Unspecified disorder of joint (shoulder region)	9
719.92	719.92 Unspecified disorder of joint (upper arm)	9
719.93	719.93 Unspecified disorder of joint (forearm)	9
719.94	719.94 Unspecified disorder of joint (hand)	9
719.95	719.95 Unspecified disorder of joint (pelvic region and thigh)	9
719.96	719.96 Unspecified disorder of joint (lower leg)	9
719.97	719.97 Unspecified disorder of joint (ankle and foot)	9
719.98	719.98 Unspecified disorder of joint (other specified site)	9
719.99	719.99 Unspecified disorder of joint (site unspecified)	9
720	720.0 Ankylosing spondylitis	9
721	721 Spondylosis and allied disorders	9
721	721.0 Cervical spondylosis without myelopathy	9
721.1	721.1 Cervical spondylosis with myelopathy	9
721.2	721.2 Thoracic spondylosis without myelopathy	9
721.3	721.3 Lumbosacral spondylosis without myelopathy	9
721.4	721.4 Thoracic or lumbar spondylosis with myelopathy	9
721.5	721.5 Kissing spine	9
721.6	721.6 Ankylosing vertebral hyperostosis	9
721.7	721.7 Traumatic spondylopathy	9
721.8	721.8 Other spondylosis and allied disorders	9
721.9	721.9 Spondylosis of unspecified site	9
722	722 Intervertebral disc disorders	9
722	722.0 Displacement of cervical intervertebral disc without myelopathy	9
722.1	722.1 Displacement of thoracic or lumbar intervertebral disc without myelopathy	9
722.2	"722.2 Displacement of intervertebral disc, site unspecified, without myelopathy"	9
722.3	722.3 Schmorl's nodes	9
722.4	722.4 Degeneration of cervical intervertebral disc	9
722.5	722.5 Degeneration of thoracic or lumbar intervertebral disc	9
722.6	"722.6 Degeneration of intervertebral disc, site unspecified"	9
722.9	722.9 Other and unspecified disc disorder	9
723	723 Other disorders of cervical region	9
723	723.0 Spinal stenosis in cervical region	9
723.1	723.1 Cervicalgia	9
729.5	729.5 Pain in limb	9
729.5	729.50 Pain in limb (multiple sites)	9
729.51	729.51 Pain in limb (shoulder region)	9
729.52	729.52 Pain in limb (upper arm)	9
729.53	729.53 Pain in limb (forearm)	9
729.54	729.54 Pain in limb (hand)	9
729.55	729.55 Pain in limb (pelvic region and thigh)	9
729.56	729.56 Pain in limb (lower leg)	9
729.57	729.57 Pain in limb (ankle and foot)	9
729.58	729.58 Pain in limb (other specified site)	9
729.59	729.59 Pain in limb (site unspecified)	9
731	731.00 Osteitis deformans without mention of bone tumour (multiple sites)	9
731.01	731.01 Osteitis deformans without mention of bone tumour (shoulder region)	9
731.02	731.02 Osteitis deformans without mention of bone tumour (upper arm)	9
731.03	731.03 Osteitis deformans without mention of bone tumour (forearm)	9
731.04	731.04 Osteitis deformans without mention of bone tumour (hand)	9
732	732 Osteochondropathies	9
732	732.0 Juvenile osteochondrosis of spine	9
732.1	732.1 Juvenile osteochondrosis of hip and pelvis	9
732.2	732.2 Nontraumatic slipped upper femoral epiphysis	9
732.3	732.3 Juvenile osteochondrosis of upper extremity	9
732.4	"732.4 Juvenile osteochondrosis of lower extremity, excluding foot"	9
732.5	732.5 Juvenile osteochondrosis of foot	9
732.6	732.6 Other juvenile osteochondrosis	9
732.7	732.7 Osteochondritis dissecans	9
732.7	732.70 Osteochondritis dissecans (multiple sites)	9
732.71	732.71 Osteochondritis dissecans (shoulder region)	9
732.72	732.72 Osteochondritis dissecans (upper arm)	9
732.73	732.73 Osteochondritis dissecans (forearm)	9
732.74	732.74 Osteochondritis dissecans (hand)	9
732.75	732.75 Osteochondritis dissecans (pelvic region and thigh)	9
732.76	732.76 Osteochondritis dissecans (lower leg)	9
732.77	732.77 Osteochondritis dissecans (ankle and foot)	9
732.78	732.78 Osteochondritis dissecans (other specified site)	9
732.79	732.79 Osteochondritis dissecans (site unspecified)	9
732.8	732.8 Other specified forms of osteochondropathy	9
732.8	732.80 Other specified forms of osteochondropathy (multiple sites)	9
732.81	732.81 Other specified forms of osteochondropathy (shoulder region)	9
732.82	732.82 Other specified forms of osteochondropathy (upper arm)	9
732.83	732.83 Other specified forms of osteochondropathy (forearm)	9
732.84	732.84 Other specified forms of osteochondropathy (hand)	9
732.85	732.85 Other specified forms of osteochondropathy (pelvic region and thigh)	9
732.86	732.86 Other specified forms of osteochondropathy (lower leg)	9
732.87	732.87 Other specified forms of osteochondropathy (ankle and foot)	9
732.88	732.88 Other specified forms of osteochondropathy (other specified site)	9
732.89	732.89 Other specified forms of osteochondropathy (site unspecified)	9
732.9	732.9 Unspecified osteochondropathy	9
733.9	733.9 Other and unspecified disorders of bone and cartilage	9
733.9	733.90 Other and unspecified disorders of bone and cartilage (multiple sites)	9
733.91	733.91 Other and unspecified disorders of bone and cartilage (shoulder region)	9
733.92	733.92 Other and unspecified disorders of bone and cartilage (upper arm)	9
733.93	733.93 Other and unspecified disorders of bone and cartilage (forearm)	9
733.94	733.94 Other and unspecified disorders of bone and cartilage (hand)	9
733.95	733.95 Other/unspec. disorders of bone and cartilage (pelvic region and thigh)	9
733.96	733.96 Other and unspecified disorders of bone and cartilage (lower leg)	9
733.97	733.97 Other and unspecified disorders of bone and cartilage (ankle and foot)	9
733.98	733.98 Other/unspec. disorders of bone and cartilage (other specified site)	9
733.99	733.99 Other and unspecified disorders of bone and cartilage (site unspecified)	9
736	736 Other acquired deformities of limbs	9
736.2	736.2 Other acquired deformities of finger	9
736.3	736.3 Acquired deformities of hip	9
736.4	736.4 Genu valgum or varum (acquired)	9
736.5	736.5 Genu recurvatum (acquired)	9
736.6	736.6 Other acquired deformities of knee	9
736.7	736.7 Other acquired deformities of ankle and foot	9
736.8	736.8 Acquired deformities of other parts of limbs	9
736.9	"736.9 Acquired deformity of limb, site unspecified"	9
754.3	754.3 Congenital dislocation of hip	9
754.3	754.30 Congenital dislocation of hip (unqualified)	9
754.31	754.31 Congenital dislocation of hip (unstable hip)	9
754.32	754.32 Congenital dislocation of hip (clicking hip)	9
754.4	754.4 Congenital genu recurvatum and bowing of long bones of leg	9
754.4	"754.40 Congenital bowing, femur"	9
754.41	"754.41 Congenital bowing, tibia and/or fibula"	9
754.42	"754.42 Congenital bow legs, not otherwise specified"	9
754.43	754.43 Genu recurvatum	9
754.44	"754.44 Dislocation of knee, congenital"	9
754.5	754.5 Varus deformities of feet	9
754.5	754.50 Varus deformities of feet (talipes equinovarus)	9
754.51	754.51 Varus deformities of feet (talipes calcaneovarus)	9
754.52	754.52 Varus deformities of feet (metatarsus varus)	9
754.53	754.53 Varus deformities of feet (complex varus deformities)	9
754.59	754.59 Varus deformities of feet (unspecified)	9
754.6	754.6 Valgus deformities of feet	9
754.6	754.60 Valgus deformities of feet (talipes calcaneovalgus)	9
754.61	754.61 Valgus deformities of feet (congenital pes planus)	9
754.69	754.69 Valgus deformities of feet (unspecified)	9
835	835 Dislocation of hip	9
835	835.0 Simple dislocation of hip	9
835.1	835.1 Compound dislocation of hip	9
836	836 Dislocation of knee	9
836	"836.0 Tear of medial cartilage or meniscus of knee, current"	9
836.1	"836.1 Tear of lateral cartilage or meniscus of knee, current"	9
836.2	"836.2 Other tear of cartilage or meniscus of knee, current"	9
836.3	"836.3 Dislocation of patella, simple"	9
836.4	"836.4 Dislocation of patella, compound"	9
836.5	"836.5 Other dislocation of knee, simple"	9
836.6	"836.6 Other dislocation of knee, compound"	9
V134	V13.4 Personal history of arthritis	9
V135	V13.5 Personal history of other musculoskeletal disorders	9
V136	V13.6 Personal history of congenital malformations	9
714	714.0 Rheumatoid arthritis	9
M11.1	M11.1 Familial chondrocalcinosis	10
M11.10	M11.10 Familial chondrocalcinosis (Multiple sites)	10
M11.11	M11.11 Familial chondrocalcinosis (Shoulder region)	10
M11.12	M11.12 Familial chondrocalcinosis (Upper arm)	10
M11.13	M11.13 Familial chondrocalcinosis (Forearm)	10
M11.14	M11.14 Familial chondrocalcinosis (Hand)	10
M11.15	M11.15 Familial chondrocalcinosis (Pelvic region and thigh)	10
M11.16	M11.16 Familial chondrocalcinosis (Lower leg)	10
M11.17	M11.17 Familial chondrocalcinosis (Ankle and foot)	10
M11.18	M11.18 Familial chondrocalcinosis (Other)	10
M11.19	M11.19 Familial chondrocalcinosis (Site unspecified)	10
M11.2	M11.2 Other chondrocalcinosis	10
M11.20	M11.20 Other chondrocalcinosis (Multiple sites)	10
M11.21	M11.21 Other chondrocalcinosis (Shoulder region)	10
M11.22	M11.22 Other chondrocalcinosis (Upper arm)	10
M11.23	M11.23 Other chondrocalcinosis (Forearm)	10
M11.24	M11.24 Other chondrocalcinosis (Hand)	10
M11.25	M11.25 Other chondrocalcinosis (Pelvic region and thigh)	10
M11.26	M11.26 Other chondrocalcinosis (Lower leg)	10
M11.27	M11.27 Other chondrocalcinosis (Ankle and foot)	10
M11.28	M11.28 Other chondrocalcinosis (Other)	10
M11.29	M11.29 Other chondrocalcinosis (Site unspecified)	10
M11.8	M11.8 Other specified crystal arthropathies	10
M11.80	M11.80 Other specified crystal arthropathies (Multiple sites)	10
M11.81	M11.81 Other specified crystal arthropathies (Shoulder region)	10
M11.82	M11.82 Other specified crystal arthropathies (Upper arm)	10
M11.83	M11.83 Other specified crystal arthropathies (Forearm)	10
M11.84	M11.84 Other specified crystal arthropathies (Hand)	10
M11.85	M11.85 Other specified crystal arthropathies (Pelvic region and thigh)	10
M11.86	M11.86 Other specified crystal arthropathies (Lower leg)	10
M11.87	M11.87 Other specified crystal arthropathies (Ankle and foot)	10
M11.88	M11.88 Other specified crystal arthropathies (Other)	10
M11.89	M11.89 Other specified crystal arthropathies (Site unspecified)	10
M11.9	M11.9 Crystal arthropathy, unspecified	10
M11.90	M11.90 Crystal arthropathy, unspecified (Multiple sites)	10
M11.91	M11.91 Crystal arthropathy, unspecified (Shoulder region)	10
M11.92	M11.92 Crystal arthropathy, unspecified (Upper arm)	10
M11.93	M11.93 Crystal arthropathy, unspecified (Forearm)	10
M11.94	M11.94 Crystal arthropathy, unspecified (Hand)	10
M11.95	M11.95 Crystal arthropathy, unspecified (Pelvic region and thigh)	10
M11.96	M11.96 Crystal arthropathy, unspecified (Lower leg)	10
M11.97	M11.97 Crystal arthropathy, unspecified (Ankle and foot)	10
M11.98	M11.98 Crystal arthropathy, unspecified (Other)	10
M11.99	M11.99 Crystal arthropathy, unspecified (Site unspecified)	10
M13	M13 Other arthritis	10
M13.0	M13.0 Polyarthritis, unspecified	10
M13.00	M13.00 Polyarthritis, unspecified (Multiple sites)	10
M13.05	M13.05 Polyarthritis, unspecified (Pelvic region and thigh)	10
M13.06	M13.06 Polyarthritis, unspecified (Lower leg)	10
M13.09	M13.09 Polyarthritis, unspecified (Site unspecified)	10
M13.1	M13.1 Monoarthritis, not elsewhere classified	10
M13.10	M13.10 Monoarthritis, not elsewhere classified (Multiple sites)	10
M13.14	M13.14 Monoarthritis, not elsewhere classified (Hand)	10
M13.15	M13.15 Monoarthritis, not elsewhere classified (Pelvic region and thigh)	10
M13.16	M13.16 Monoarthritis, not elsewhere classified (Lower leg)	10
M13.19	M13.19 Monoarthritis, not elsewhere classified (Site unspecified)	10
M13.8	M13.8 Other specified arthritis	10
M13.80	M13.80 Other specified arthritis (Multiple sites)	10
M13.84	M13.84 Other specified arthritis (Hand)	10
M13.85	M13.85 Other specified arthritis (Pelvic region and thigh)	10
M13.86	M13.86 Other specified arthritis (Lower leg)	10
M13.89	M13.89 Other specified arthritis (Site unspecified)	10
M13.9	M13.9 Arthritis, unspecified	10
M13.90	M13.90 Arthritis, unspecified (Multiple sites)	10
M13.94	M13.94 Arthritis, unspecified (Hand)	10
M13.95	M13.95 Arthritis, unspecified (Pelvic region and thigh)	10
M13.96	M13.96 Arthritis, unspecified (Lower leg)	10
M13.99	M13.99 Arthritis, unspecified (Site unspecified)	10
M15	M15 Polyarthrosis	10
M15.0	M15.0 Primary generalised (osteo)arthrosis	10
M15.1	M15.1 Heberden's nodes (with arthropathy)	10
M15.2	M15.2 Bouchard's nodes (with arthropathy)	10
M15.3	M15.3 Secondary multiple arthrosis	10
M15.4	M15.4 Erosive (osteo)arthrosis	10
M15.8	M15.8 Other polyarthrosis	10
M15.9	M15.9 Polyarthrosis, unspecified	10
M15.99	M15.99 Polyosteoarthritis, unspecified	10
M16	M16 Coxarthrosis [arthrosis of hip]	10
M16.0	M16.0 Primary coxarthrosis, bilateral	10
M16.1	M16.1 Other primary coxarthrosis	10
M16.2	M16.2 Coxarthrosis resulting from dysplasia, bilateral	10
M16.3	M16.3 Other dysplastic coxarthrosis	10
M16.4	M16.4 Posttraumatic coxarthrosis, bilateral	10
M16.5	M16.5 Other posttraumatic coxarthrosis	10
M16.6	M16.6 Other secondary coxarthrosis, bilateral	10
M16.7	M16.7 Other secondary coxarthrosis	10
M16.9	M16.9 Coxarthrosis, unspecified	10
M17	M17 Gonarthrosis [arthrosis of knee]	10
M17.0	M17.0 Primary gonarthrosis, bilateral	10
M17.1	M17.1 Other primary gonarthrosis	10
M17.2	M17.2 Posttraumatic gonarthrosis, bilateral	10
M17.3	M17.3 Other posttraumatic gonarthrosis	10
M17.4	M17.4 Other secondary gonarthrosis, bilateral	10
M17.5	M17.5 Other secondary gonarthrosis	10
M17.9	M17.9 Gonarthrosis, unspecified	10
M18	M18 Arthrosis of first carpometacarpal joint	10
M18.0	M18.0 Primary arthrosis of first carpometacarpal joints, bilateral	10
M18.1	M18.1 Other primary arthrosis of first carpometacarpal joint	10
M18.2	M18.2 Posttraumatic arthrosis of first carpometacarpal joints, bilateral	10
M18.3	M18.3 Other posttraumatic arthrosis of first carpometacarpal joint	10
M18.4	M18.4 Other secondary arthrosis of first carpometacarpal joints, bilateral	10
M18.5	M18.5 Other secondary arthrosis of first carpometacarpal joint	10
M18.9	M18.9 Arthrosis of first carpometacarpal joint, unspecified	10
M19	M19 Other arthrosis	10
M19.0	M19.0 Primary arthrosis of other joints	10
M19.00	M19.00 Primary arthrosis of other joints (Multiple sites)	10
M19.01	M19.01 Primary arthrosis of other joints (Shoulder region)	10
M19.02	M19.02 Primary arthrosis of other joints (Upper arm)	10
M19.03	M19.03 Primary arthrosis of other joints (Forearm)	10
M19.04	M19.04 Primary arthrosis of other joints (Hand)	10
M19.05	M19.05 Primary arthrosis of other joints (Pelvic region and thigh)	10
M19.06	M19.06 Primary arthrosis of other joints-Lower leg	10
M19.07	M19.07 Primary arthrosis of other joints (Ankle and foot)	10
M19.08	M19.08 Primary arthrosis of other joints (Other)	10
M19.09	M19.09 Primary arthrosis of other joints (Site unspecified)	10
M19.1	M19.1 Posttraumatic arthrosis of other joints	10
M19.10	M19.10 Post-traumatic arthrosis of other joints (Multiple sites)	10
M19.11	M19.11 Post-traumatic arthrosis of other joints (Shoulder region)	10
M19.12	M19.12 Post-traumatic arthrosis of other joints (Upper arm)	10
M19.13	M19.13 Post-traumatic arthrosis of other joints (Forearm)	10
M19.14	M19.14 Post-traumatic arthrosis of other joints (Hand)	10
M19.15	M19.15 Post-traumatic arthrosis of other joints (Pelvic region and thigh)	10
M19.16	M19.16 Post-traumatic arthrosis of other joints-Lower leg	10
M19.17	M19.17 Post-traumatic arthrosis of other joints (Ankle and foot)	10
M19.18	M19.18 Post-traumatic arthrosis of other joints (Other)	10
M19.19	M19.19 Post-traumatic arthrosis of other joints (Site unspecified)	10
M19.2	M19.2 Other secondary arthrosis	10
M19.20	M19.20 Other secondary arthrosis (Multiple sites)	10
M19.21	M19.21 Other secondary arthrosis (Shoulder region)	10
M19.22	M19.22 Other secondary arthrosis (Upper arm)	10
M19.23	M19.23 Other secondary arthrosis (Forearm)	10
M19.24	M19.24 Other secondary arthrosis (Hand)	10
M19.25	M19.25 Other secondary arthrosis (Pelvic region and thigh)	10
M19.26	M19.26 Other secondary arthrosis of other joints-Lower leg	10
M19.27	M19.27 Other secondary arthrosis (Ankle and foot)	10
M19.28	M19.28 Other secondary arthrosis (Other)	10
M19.29	M19.29 Other secondary arthrosis (Site unspecified)	10
M19.8	M19.8 Other specified arthrosis	10
M19.80	M19.80 Other specified arthrosis (Multiple sites)	10
M19.81	M19.81 Other specified arthrosis (Shoulder region)	10
M19.82	M19.82 Other specified arthrosis (Upper arm)	10
M19.83	M19.83 Other specified arthrosis (Forearm)	10
M19.84	M19.84 Other specified arthrosis (Hand)	10
M19.85	M19.85 Other specified arthrosis (Pelvic region and thigh)	10
M19.86	M19.86 Other specified arthrosis (Lower leg)	10
M19.87	M19.87 Other specified arthrosis (Ankle and foot)	10
M19.88	M19.88 Other specified arthrosis (Other)	10
M19.89	M19.89 Other specified arthrosis (Site unspecified)	10
M19.9	M19.9 Arthrosis, unspecified	10
M19.90	M19.90 Arthrosis, unspecified (Multiple sites)	10
M19.91	M19.91 Arthrosis, unspecified (Shoulder region)	10
M19.92	M19.92 Arthrosis, unspecified (Upper arm)	10
M19.93	M19.93 Arthrosis, unspecified (Forearm)	10
M19.94	M19.94 Arthrosis, unspecified (Hand)	10
M19.95	M19.95 Arthrosis, unspecified (Pelvic region and thigh)	10
M19.96	M19.96 Arthrosis, unspecified-Lower leg	10
M19.97	M19.97 Arthrosis, unspecified (Ankle and foot)	10
M19.98	M19.98 Arthrosis, unspecified (Other)	10
M19.99	M19.99 Arthrosis, unspecified (Site unspecified)	10
M20	M20 Acquired deformities of fingers and toes	10
M20.0	M20.0 Deformity of finger(s)	10
M21	M21 Other acquired deformities of limbs	10
M21.0	M21.0 Valgus deformity, not elsewhere classified	10
M21.00	M21.00 Valgus deformity, not elsewhere classified (Multiple sites)	10
M21.05	M21.05 Valgus deformity, not elsewhere classified (Pelvic region and thigh)	10
M21.06	M21.06 Valgus deformity, not elsewhere classified (Lower leg)	10
M21.09	M21.09 Valgus deformity, not elsewhere classified (Site unspecified)	10
M21.1	M21.1 Varus deformity, not elsewhere classified	10
M21.10	M21.10 Varus deformity, not elsewhere classified (Multiple sites)	10
M21.15	M21.15 Varus deformity, not elsewhere classified (Pelvic region and thigh)	10
M21.16	M21.16 Varus deformity, not elsewhere classified (Lower leg)	10
M21.19	M21.19 Varus deformity, not elsewhere classified (Site unspecified)	10
M21.2	M21.2 Flexion deformity	10
M21.20	M21.20 Flexion deformity (Multiple sites)	10
M21.24	M21.24 Flexion deformity (Hand)	10
M21.25	M21.25 Flexion deformity (Pelvic region and thigh)	10
M21.26	M21.26 Flexion deformity (Lower leg)	10
M21.29	M21.29 Flexion deformity (Site unspecified)	10
M22	M22 Disorders of patella	10
M22.0	M22.0 Recurrent dislocation of patella	10
M22.1	M22.1 Recurrent subluxation of patella	10
M22.2	M22.2 Patellofemoral disorders	10
M22.3	M22.3 Other derangements of patella	10
M22.4	M22.4 Chondromalacia patellae	10
M22.8	M22.8 Other disorders of patella	10
M22.9	M22.9 Disorder of patella, unspecified	10
M23	M23 Internal derangement of knee	10
M23.0	M23.0 Cystic meniscus	10
M23.00	M23.00 Cystic meniscus (Multiple sites)	10
M23.01	M23.01 Cystic meniscus (Anterior cruciate ligament or Anterior horn of medial meniscus)	10
M23.02	M23.02 Cystic meniscus (Posterior cruciate ligament or Posterior horn of medial meniscus)	10
M23.03	M23.03 Cystic meniscus (Medial collateral ligament or Other and unspecified medial meniscus)	10
M23.04	M23.04 Cystic meniscus (Lateral collateral ligament or Anterior horn of lateral meniscus)	10
M23.05	M23.05 Cystic meniscus (Posterior horn of lateral meniscus)	10
M23.06	M23.06 Cystic meniscus (Other and unspecified lateral meniscus)	10
M23.07	M23.07 Cystic meniscus-Capsular lig	10
M23.09	M23.09 Cystic meniscus (Unspecified ligament or Unspecified meniscus)	10
M23.1	M23.1 Discoid meniscus (congenital)	10
M23.10	M23.10 Discoid meniscus (congenital) (Multiple sites)	10
M23.11	M23.11 Discoid meniscus (congenital) (Anterior cruciate ligament or Anterior horn of medial meniscus)	10
M23.12	M23.12 Discoid meniscus (congenital) (Posterior cruciate ligament or Posterior horn of medial meniscus)	10
M23.13	M23.13 Discoid meniscus (congenital) (Medial collateral ligament or Other and unspecified medial meniscus)	10
M23.14	M23.14 Discoid meniscus (congenital) (Lateral collateral ligament or Anterior horn of lateral meniscus)	10
M23.15	M23.15 Discoid meniscus (congenital) (Posterior horn of lateral meniscus)	10
M23.16	M23.16 Discoid meniscus (congenital) (Other and unspecified lateral meniscus)	10
M23.17	M23.17 Discoid meniscus (congenital)-Capsular lig	10
M23.19	M23.19 Discoid meniscus (congenital) (Unspecified ligament or Unspecified meniscus)	10
M23.2	M23.2 Derangement of meniscus due to old tear or injury	10
M23.20	M23.20 Derangement of meniscus due to old tear or injury (Multiple sites)	10
M23.21	M23.21 Derangement of meniscus due to old tear or injury (Anterior cruciate ligament or Anterior horn of medial meniscus)	10
M23.22	M23.22 Derangement of meniscus due to old tear or injury (Posterior cruciate ligament or Posterior horn of medial meniscus)	10
M23.23	M23.23 Derangement of meniscus due to old tear or injury (Medial collateral ligament or Other and unspecified medial meniscus)	10
M23.24	M23.24 Derangement of meniscus due to old tear or injury (Lateral collateral ligament or Anterior horn of lateral meniscus)	10
M23.25	M23.25 Derangement of meniscus due to old tear or injury (Posterior horn of lateral meniscus)	10
M23.26	M23.26 Derangement of meniscus due to old tear or injury (Other and unspecified lateral meniscus)	10
M23.27	M23.27 Derangement of meniscus due to old tear or injury-Capsular	10
M23.28	M23.29 Derangement of meniscus due to old tear or injury (Unspecified ligament or Unspecified meniscus)	10
M23.3	M23.3 Other meniscus derangements	10
M23.30	M23.30 Other meniscus derangements (Multiple sites)	10
M23.31	M23.31 Other meniscus derangements (Anterior cruciate ligament or Anterior horn of medial meniscus)	10
M23.32	M23.32 Other meniscus derangements (Posterior cruciate ligament or Posterior horn of medial meniscus)	10
M23.33	M23.33 Other meniscus derangements (Medial collateral ligament or Other and unspecified medial meniscus)	10
M23.34	M23.34 Other meniscus derangements (Lateral collateral ligament or Anterior horn of lateral meniscus)	10
M23.35	M23.35 Other meniscus derangements (Posterior horn of lateral meniscus)	10
M23.36	M23.36 Other meniscus derangements (Other and unspecified lateral meniscus)	10
M23.37	M23.37 Other meniscus derangements-Capsular lig	10
M23.39	M23.39 Other meniscus derangements (Unspecified ligament or Unspecified meniscus)	10
M23.4	M23.4 Loose body in knee	10
M23.40	M23.40 Loose body in knee-Mult sites	10
M23.41	M23.41 Loose body in knee-Ant lig/hrn men	10
M23.42	M23.42 Loose body in knee-Pst lig/hrn men	10
M23.43	M23.43 Loose body in knee-Med lig/oth men	10
M23.44	M23.44 Loose body in knee-Lat lig/ant men	10
M23.45	M23.45 Loose body in knee-Pst hrn lat men	10
M23.46	M23.46 Loose body in knee-O/unsp lat men	10
M23.47	M23.47 Loose body in knee-Capsular lig	10
M23.49	M23.49 Loose body in knee-Unspec lig/men	10
M23.5	M23.5 Chronic instability of knee	10
M23.50	M23.50 Chronic instability of knee (Multiple sites)	10
M23.51	M23.51 Chronic instability of knee (Anterior cruciate ligament or Anterior horn of medial meniscus)	10
M23.52	M23.52 Chronic instability of knee (Posterior cruciate ligament or Posterior horn of medial meniscus)	10
M23.53	M23.53 Chronic instability of knee (Medial collateral ligament or Other and unspecified medial meniscus)	10
M23.54	M23.54 Chronic instability of knee (Lateral collateral ligament or Anterior horn of lateral meniscus)	10
M23.55	M23.55 Chronic instability of knee (Posterior horn of lateral meniscus)	10
M23.56	M23.56 Chronic instability of knee (Other and unspecified lateral meniscus)	10
M23.57	M23.57 Chronic instability of knee (Capsular ligament)	10
M23.59	M23.59 Chronic instability of knee (Unspecified ligament or Unspecified meniscus)	10
M23.6	M23.6 Other spontaneous disruption of ligament(s) of knee	10
M23.60	M23.60 Other spontaneous disruption of ligament(s) of knee (Multiple sites)	10
M23.61	M23.61 Other spontaneous disruption of ligament(s) of knee (Anterior cruciate ligament or Anterior horn of medial meniscus)	10
M23.62	M23.62 Other spontaneous disruption of ligament(s) of knee (Posterior cruciate ligament or Posterior horn of medial meniscus)	10
M23.63	M23.63 Other spontaneous disruption of ligament(s) of knee (Medial collateral ligament or Other and unspecified medial meniscus)	10
M23.64	M23.64 Other spontaneous disruption of ligament(s) of knee (Lateral collateral ligament or Anterior horn of lateral meniscus)	10
M23.65	M23.65 Other spontaneous disruption of ligament(s) of knee-Pst hrn	10
M23.66	M23.66 Other spontaneous disruption of ligament(s) of knee-O/unsp	10
M23.67	M23.67 Other spontaneous disruption of ligament(s) of knee (Capsular ligament)	10
M23.69	M23.69 Other spontaneous disruption of ligament(s) of knee (Unspecified ligament or Unspecified meniscus)	10
M23.8	M23.8 Other internal derangements of knee	10
M23.80	M23.80 Other internal derangements of knee (Multiple sites)	10
M23.81	M23.81 Other internal derangements of knee (Anterior cruciate ligament or Anterior horn of medial meniscus)	10
M23.82	M23.82 Other internal derangements of knee (Posterior cruciate ligament or Posterior horn of medial meniscus)	10
M23.83	M23.83 Other internal derangements of knee (Medial collateral ligament or Other and unspecified medial meniscus)	10
M23.84	M23.84 Other internal derangements of knee (Lateral collateral ligament or Anterior horn of lateral meniscus)	10
M23.85	M23.85 Other internal derangements of knee (Posterior horn of lateral meniscus)	10
M23.86	M23.86 Other internal derangements of knee (Other and unspecified lateral meniscus)	10
M23.87	M23.87 Other internal derangements of knee (Capsular ligament)	10
M23.89	M23.89 Other internal derangements of knee (Unspecified ligament or Unspecified meniscus)	10
M23.9	M23.9 Internal derangement of knee, unspecified	10
M23.90	M23.90 Internal derangement of knee, unspecified (Multiple sites)	10
M23.91	M23.91 Internal derangement of knee, unspecified (Anterior cruciate ligament or Anterior horn of medial meniscus)	10
M23.92	M23.92 Internal derangement of knee, unspecified (Posterior cruciate ligament or Posterior horn of medial meniscus)	10
M23.93	M23.93 Internal derangement of knee, unspecified (Medial collateral ligament or Other and unspecified medial meniscus)	10
M23.94	M23.94 Internal derangement of knee, unspecified (Lateral collateral ligament or Anterior horn of lateral meniscus)	10
M23.95	M23.95 Internal derangement of knee, unspecified (Posterior horn of lateral meniscus)	10
M23.96	M23.96 Internal derangement of knee, unspecified (Other and unspecified lateral meniscus)	10
M23.97	M23.97 Internal derangement of knee, unspecified (Capsular ligament)	10
M23.99	M23.99 Internal derangement of knee, unspecified (Unspecified ligament or Unspecified meniscus)	10
M24	M24 Other specific joint derangements	10
M24.0	M24.0 Loose body in joint	10
M24.00	M24.00 Loose body in joint (Multiple sites)	10
M24.01	M24.01 Loose body in joint (Shoulder region)	10
M24.02	M24.02 Loose body in joint (Upper arm)	10
M24.03	M24.03 Loose body in joint (Forearm)	10
M24.04	M24.04 Loose body in joint (Hand)	10
M24.05	M24.05 Loose body in joint (Pelvic region and thigh)	10
M24.06	M24.06 Loose body in joint-Lower leg	10
M24.07	M24.07 Loose body in joint (Ankle and foot)	10
M24.08	M24.08 Loose body in joint (Other)	10
M24.09	M24.09 Loose body in joint (Site unspecified)	10
M24.1	M24.1 Other articular cartilage disorders	10
M24.10	M24.10 Other articular cartilage disorders (Multiple sites)	10
M24.11	M24.11 Other articular cartilage disorders (Shoulder region)	10
M24.12	M24.12 Other articular cartilage disorders (Upper arm)	10
M24.13	M24.13 Other articular cartilage disorders (Forearm)	10
M24.14	M24.14 Other articular cartilage disorders (Hand)	10
M24.15	M24.15 Other articular cartilage disorders (Pelvic region and thigh)	10
M24.16	M24.16 Other articular cartilage disorders (Lower leg)	10
M24.17	M24.17 Other articular cartilage disorders (Ankle and foot)	10
M24.18	M24.18 Other articular cartilage disorders (Other)	10
M24.19	M24.19 Other articular cartilage disorders (Site unspecified)	10
M24.2	M24.2 Disorder of ligament	10
M24.20	M24.20 Disorder of ligament (Multiple sites)	10
M24.21	M24.21 Disorder of ligament (Shoulder region)	10
M24.22	M24.22 Disorder of ligament (Upper arm)	10
M24.23	M24.23 Disorder of ligament (Forearm)	10
M24.24	M24.24 Disorder of ligament (Hand)	10
M24.25	M24.25 Disorder of ligament (Pelvic region and thigh)	10
M24.26	M24.26 Disorder of ligament (Lower leg)	10
M24.27	M24.27 Disorder of ligament (Ankle and foot)	10
M24.28	M24.28 Disorder of ligament (Other)	10
M24.29	M24.29 Disorder of ligament (Site unspecified)	10
M24.3	M24.3 Pathological dislocation and subluxation of joint, not elsewhere classified	10
M24.30	M24.30 Pathological dislocation and subluxation of joint, not elsewhere classified (Multiple sites)	10
M24.34	M24.34 Pathological dislocation and subluxation of joint, not elsewhere classified (Hand)	10
M24.35	M24.35 Pathological dislocation and subluxation of joint, not elsewhere classified (Pelvic region and thigh)	10
M24.36	M24.36 Pathological dislocation and subluxation of joint, not elsewhere classified (Lower leg)	10
M24.39	M24.39 Pathological dislocation and subluxation of joint, not elsewhere classified (Site unspecified)	10
M24.4	M24.4 Recurrent dislocation and subluxation of joint	10
M24.40	M24.40 Recurrent dislocation and subluxation of joint (Multiple sites)	10
M24.44	M24.44 Recurrent dislocation and subluxation of joint (Hand)	10
M24.45	M24.45 Recurrent dislocation and subluxation of joint (Pelvic region and thigh)	10
M24.46	M24.46 Recurrent dislocation and subluxation of joint (Lower leg)	10
M24.49	M24.49 Recurrent dislocation and subluxation of joint (Site unspecified)	10
M24.5	M24.5 Contracture of joint	10
M24.50	M24.50 Contracture of joint (Multiple sites)	10
M24.54	M24.54 Contracture of joint (Hand)	10
M24.55	M24.55 Contracture of joint (Pelvic region and thigh)	10
M24.56	M24.56 Contracture of joint (Lower leg)	10
M24.59	M24.59 Contracture of joint (Site unspecified)	10
M24.6	M24.6 Ankylosis of joint	10
M24.60	M24.60 Ankylosis of joint (Multiple sites)	10
M24.64	M24.64 Ankylosis of joint (Hand)	10
M24.65	M24.65 Ankylosis of joint (Pelvic region and thigh)	10
M24.66	M24.66 Ankylosis of joint (Lower leg)	10
M24.69	M24.69 Ankylosis of joint (Site unspecified)	10
M24.7	M24.7 Protrusio acetabuli	10
M24.70	M24.70 Protrusio acetabuli-Mult sites	10
M24.71	M24.71 Protrusio acetabuli-Shldr region	10
M24.72	M24.72 Protrusio acetabuli-Upper arm	10
M24.73	M24.73 Protrusio acetabuli-Forearm	10
M24.74	M24.74 Protrusio acetabuli-Hand	10
M24.75	M24.75 Protrusio acetabuli-Pelvic/thigh	10
M24.76	M24.76 Protrusio acetabuli-Lower leg	10
M24.77	M24.77 Protrusio acetabuli-Ankle/foot	10
M24.78	M24.78 Protrusio acetabuli-Other	10
M24.79	M24.79 Protrusio acetabuli-Site unspec	10
M24.8	M24.8 Other specific joint derangements, not elsewhere classified	10
M24.80	M24.80 Other specific joint derangements, not elsewhere classified (Multiple sites)	10
M24.84	M24.84 Other specific joint derangements, not elsewhere classified (Hand)	10
M24.85	M24.85 Other specific joint derangements, not elsewhere classified (Pelvic region and thigh)	10
M24.86	M24.86 Other specific joint derangements, not elsewhere classified (Lower leg)	10
M24.89	M24.89 Other specific joint derangements, not elsewhere classified (Site unspecified)	10
M24.9	M24.9 Joint derangement, unspecified	10
M24.90	M24.90 Joint derangement, unspecified (Multiple sites)	10
M24.94	M24.94 Joint derangement, unspecified (Hand)	10
M24.95	M24.95 Joint derangement, unspecified (Pelvic region and thigh)	10
M24.96	M24.96 Joint derangement, unspecified (Lower leg)	10
M24.99	M24.99 Joint derangement, unspecified (Site unspecified)	10
M25	M25 Other joint disorders, not elsewhere classified	10
M25.5	M25.5 Pain in joint	10
M25.50	M25.50 Pain in joint (Multiple sites)	10
M25.51	M25.51 Pain in joint (Shoulder region)	10
M25.52	M25.52 Pain in joint (Upper arm)	10
M25.53	M25.53 Pain in joint (Forearm)	10
M25.54	M25.54 Pain in joint (Hand)	10
M25.55	M25.55 Pain in joint (Pelvic region and thigh)	10
M25.56	M25.56 Pain in joint (Lower leg)	10
M25.57	M25.57 Pain in joint (Ankle and foot)	10
M25.58	M25.58 Pain in joint (Other)	10
M25.59	M25.59 Pain in joint (Site unspecified)	10
M25.6	M25.6 Stiffness of joint, not elsewhere classified	10
M25.60	M25.60 Stiffness of joint, not elsewhere classified (Multiple sites)	10
M25.61	M25.61 Stiffness of joint, not elsewhere classified (Shoulder region)	10
M25.62	M25.62 Stiffness of joint, not elsewhere classified (Upper arm)	10
M25.63	M25.63 Stiffness of joint, not elsewhere classified (Forearm)	10
M25.64	M25.64 Stiffness of joint, not elsewhere classified (Hand)	10
M25.65	M25.65 Stiffness of joint, not elsewhere classified (Pelvic region and thigh)	10
M25.66	M25.66 Stiffness of joint, not elsewhere classified (Lower leg)	10
M25.67	M25.67 Stiffness of joint, not elsewhere classified (Ankle and foot)	10
M25.68	M25.68 Stiffness of joint, not elsewhere classified (Other)	10
M25.69	M25.69 Stiffness of joint, not elsewhere classified (Site unspecified)	10
M25.7	M25.7 Osteophyte	10
M25.70	M25.70 Osteophyte (Multiple sites)	10
M25.71	M25.71 Osteophyte (Shoulder region)	10
M25.72	M25.72 Osteophyte (Upper arm)	10
M25.73	M25.73 Osteophyte (Forearm)	10
M25.74	M25.74 Osteophyte (Hand)	10
M25.75	M25.75 Osteophyte (Pelvic region and thigh)	10
M25.76	M25.76 Osteophyte (Lower leg)	10
M25.77	M25.77 Osteophyte (Ankle and foot)	10
M25.78	M25.78 Osteophyte (Other)	10
M25.79	M25.79 Osteophyte (Site unspecified)	10
M25.8	M25.8 Other specified joint disorders	10
M25.80	M25.80 Other specified joint disorders (Multiple sites)	10
M25.81	M25.81 Other specified joint disorders (Shoulder region)	10
M25.82	M25.82 Other specified joint disorders (Upper arm)	10
M25.83	M25.83 Other specified joint disorders (Forearm)	10
M25.84	M25.84 Other specified joint disorders (Hand)	10
M25.85	M25.85 Other specified joint disorders (Pelvic region and thigh)	10
M25.86	M25.86 Other specified joint disorders (Lower leg)	10
M25.87	M25.87 Other specified joint disorders (Ankle and foot)	10
M25.88	M25.88 Other specified joint disorders (Other)	10
M25.89	M25.89 Other specified joint disorders (Site unspecified)	10
M25.9	M25.9 Joint disorder, unspecified	10
M25.90	M25.90 Joint disorder, unspecified (Multiple sites)	10
M25.91	M25.91 Joint disorder, unspecified (Shoulder region)	10
M25.92	M25.92 Joint disorder, unspecified (Upper arm)	10
M25.93	M25.93 Joint disorder, unspecified (Forearm)	10
M25.94	M25.94 Joint disorder, unspecified (Hand)	10
M25.95	M25.95 Joint disorder, unspecified (Pelvic region and thigh)	10
M25.96	M25.96 Joint disorder, unspecified (Lower leg)	10
M25.97	M25.97 Joint disorder, unspecified (Ankle and foot)	10
M25.98	M25.98 Joint disorder, unspecified (Other)	10
M25.99	M25.99 Joint disorder, unspecified (Site unspecified)	10
M42	M42 Spinal osteochondrosis	10
M42.0	M42.0 Juvenile osteochondrosis of spine	10
M42.00	M42.00 Juvenile osteochondrosis of spine (Multiple sites in spine)	10
M42.01	M42.01 Juvenile osteochondrosis of spine (Occipito-atlanto-axial region)	10
M42.02	M42.02 Juvenile osteochondrosis of spine (Cervical region)	10
M42.03	M42.03 Juvenile osteochondrosis of spine (Cervicothoracic region)	10
M42.04	M42.04 Juvenile osteochondrosis of spine (Thoracic region)	10
M42.05	M42.05 Juvenile osteochondrosis of spine (Thoracolumbar region)	10
M42.06	M42.06 Juvenile osteochondrosis of spine (Lumbar region)	10
M42.07	M42.07 Juvenile osteochondrosis of spine (Lumbosacral region)	10
M42.08	M42.08 Juvenile osteochondrosis of spine (Sacral and sacrococcygeal region)	10
M42.09	M42.09 Juvenile osteochondrosis of spine (Site unspecified)	10
M42.1	M42.1 Adult osteochondrosis of spine	10
M42.10	M42.10 Adult osteochondrosis of spine (Multiple sites in spine)	10
M42.11	M42.11 Adult osteochondrosis of spine (Occipito-atlanto-axial region)	10
M42.12	M42.12 Adult osteochondrosis of spine (Cervical region)	10
M42.13	M42.13 Adult osteochondrosis of spine (Cervicothoracic region)	10
M42.14	M42.14 Adult osteochondrosis of spine (Thoracic region)	10
M42.15	M42.15 Adult osteochondrosis of spine (Thoracolumbar region)	10
M42.16	M42.16 Adult osteochondrosis of spine (Lumbar region)	10
M42.17	M42.17 Adult osteochondrosis of spine (Lumbosacral region)	10
M42.18	M42.18 Adult osteochondrosis of spine (Sacral and sacrococcygeal region)	10
M42.19	M42.19 Adult osteochondrosis of spine (Site unspecified)	10
M42.9	M42.9 Spinal osteochondrosis, unspecified	10
M42.90	M42.90 Spinal osteochondrosis, unspecified (Multiple sites in spine)	10
M42.91	M42.91 Spinal osteochondrosis, unspecified (Occipito-atlanto-axial region)	10
M42.92	M42.92 Spinal osteochondrosis, unspecified (Cervical region)	10
M42.93	M42.93 Spinal osteochondrosis, unspecified (Cervicothoracic region)	10
M42.94	M42.94 Spinal osteochondrosis, unspecified (Thoracic region)	10
M42.95	M42.95 Spinal osteochondrosis, unspecified (Thoracolumbar region)	10
M42.96	M42.96 Spinal osteochondrosis, unspecified (Lumbar region)	10
M42.97	M42.97 Spinal osteochondrosis, unspecified (Lumbosacral region)	10
M42.98	M42.98 Spinal osteochondrosis, unspecified (Sacral and sacrococcygeal region)	10
M42.99	M42.99 Spinal osteochondrosis, unspecified (Site unspecified)	10
M47.2	M47.2 Other spondylosis with radiculopathy	10
M47.20	M47.20 Other spondylosis with radiculopathy (Multiple sites in spine)	10
M47.21	M47.21 Other spondylosis with radiculopathy (Occipito-atlanto-axial region)	10
M47.22	M47.22 Other spondylosis with radiculopathy (Cervical region)	10
M47.23	M47.23 Other spondylosis with radiculopathy (Cervicothoracic region)	10
M47.24	M47.24 Other spondylosis with radiculopathy (Thoracic region)	10
M47.25	M47.25 Other spondylosis with radiculopathy (Thoracolumbar region)	10
M47.26	M47.26 Other spondylosis with radiculopathy (Lumbar region)	10
M47.27	M47.27 Other spondylosis with radiculopathy (Lumbosacral region)	10
M47.28	M47.28 Other spondylosis with radiculopathy (Sacral and sacrococcygeal region)	10
M47.29	M47.29 Other spondylosis with radiculopathy (Site unspecified)	10
M47.8	M47.8 Other spondylosis	10
M47.80	M47.80 Other spondylosis (Multiple sites in spine)	10
M47.81	M47.81 Other spondylosis (Occipito-atlanto-axial region)	10
M47.82	M47.82 Other spondylosis (Cervical region)	10
M47.83	M47.83 Other spondylosis (Cervicothoracic region)	10
M47.84	M47.84 Other spondylosis (Thoracic region)	10
M47.85	M47.85 Other spondylosis (Thoracolumbar region)	10
M47.86	M47.86 Other spondylosis (Lumbar region)	10
M47.87	M47.87 Other spondylosis (Lumbosacral region)	10
M47.88	M47.88 Other spondylosis (Sacral and sacrococcygeal region)	10
M47.89	M47.89 Other spondylosis (Site unspecified)	10
M47.9	M47.9 Spondylosis, unspecified	10
M47.90	M47.90 Spondylosis, unspecified (Multiple sites in spine)	10
M47.91	M47.91 Spondylosis, unspecified (Occipito-atlanto-axial region)	10
M47.92	M47.92 Spondylosis, unspecified (Cervical region)	10
M47.93	M47.93 Spondylosis, unspecified (Cervicothoracic region)	10
M47.94	M47.94 Spondylosis, unspecified (Thoracic region)	10
M47.95	M47.95 Spondylosis, unspecified (Thoracolumbar region)	10
M47.96	M47.96 Spondylosis, unspecified (Lumbar region)	10
M47.97	M47.97 Spondylosis, unspecified (Lumbosacral region)	10
M47.98	M47.98 Spondylosis, unspecified (Sacral and sacrococcygeal region)	10
M49.52	M49.52 Collapsed vertebra in diseases classified elsewhere (Cervical region)	10
M49.53	M49.53 Collapsed vertebra in diseases classified elsewhere (Cervicothoracic region)	10
M49.54	M49.54 Collapsed vertebra in diseases classified elsewhere (Thoracic region)	10
M49.55	M49.55 Collapsed vertebra in diseases classified elsewhere (Thoracolumbar region)	10
M49.56	M49.56 Collapsed vertebra in diseases classified elsewhere (Lumbar region)	10
M49.57	M49.57 Collapsed vertebra in diseases classified elsewhere (Lumbosacral region)	10
M49.58	M49.58 Collapsed vertebra in diseases classified elsewhere (Sacral and sacrococcygeal region)	10
M49.59	M49.59 Collapsed vertebra in diseases classified elsewhere (Site unspecified)	10
M49.8	M49.8 Spondylopathy in other diseases classified elsewhere	10
M49.80	M49.80 Spondylopathy in other diseases classified elsewhere (Multiple sites in spine)	10
M49.81	M49.81 Spondylopathy in other diseases classified elsewhere (Occipito-atlanto-axial region)	10
M49.82	M49.82 Spondylopathy in other diseases classified elsewhere (Cervical region)	10
M49.83	M49.83 Spondylopathy in other diseases classified elsewhere (Cervicothoracic region)	10
M49.84	M49.84 Spondylopathy in other diseases classified elsewhere (Thoracic region)	10
M49.85	M49.85 Spondylopathy in other diseases classified elsewhere (Thoracolumbar region)	10
M49.86	M49.86 Spondylopathy in other diseases classified elsewhere (Lumbar region)	10
M49.87	M49.87 Spondylopathy in other diseases classified elsewhere (Lumbosacral region)	10
M49.88	M49.88 Spondylopathy in other diseases classified elsewhere (Sacral and sacrococcygeal region)	10
M49.89	M49.89 Spondylopathy in other diseases classified elsewhere (Site unspecified)	10
M50	M50 Cervical disk disorders	10
M50.1	M50.1 Cervical disk disorder with radiculopathy	10
M50.2	M50.2 Other cervical disk displacement	10
M50.3	M50.3 Other cervical disk degeneration	10
M50.8	M50.8 Other cervical disk disorders	10
M50.9	M50.9 Cervical disk disorder, unspecified	10
M51	M51 Other intervertebral disk disorders	10
M94.9	M94.9 Disorder of cartilage, unspecified	10
M94.90	M94.90 Disorder of cartilage, unspecified (Multiple sites)	10
M94.91	M94.91 Disorder of cartilage, unspecified (Shoulder region)	10
M94.92	M94.92 Disorder of cartilage, unspecified (Upper arm)	10
M94.93	M94.93 Disorder of cartilage, unspecified (Forearm)	10
M94.94	M94.94 Disorder of cartilage, unspecified (Hand)	10
M94.95	M94.95 Disorder of cartilage, unspecified (Pelvic region and thigh)	10
M94.96	M94.96 Disorder of cartilage, unspecified (Lower leg)	10
M94.97	M94.97 Disorder of cartilage, unspecified (Ankle and foot)	10
M94.98	M94.98 Disorder of cartilage, unspecified (Other)	10
M94.99	M94.99 Disorder of cartilage, unspecified (Site unspecified)	10
Q65	Q65 Congenital deformities of hip	10
Q65.0	Q65.0 Congenital dislocation of hip, unilateral	10
Q65.1	Q65.1 Congenital dislocation of hip, bilateral	10
Q65.2	Q65.2 Congenital dislocation of hip, unspecified	10
Q65.3	Q65.3 Congenital subluxation of hip, unilateral	10
Q65.4	Q65.4 Congenital subluxation of hip, bilateral	10
Q65.5	Q65.5 Congenital subluxation of hip, unspecified	10
Q65.6	Q65.6 Unstable hip	10
Q65.7	Q65.8 Other congenital deformities of hip	10
Q65.8	Q65.9 Congenital deformity of hip, unspecified	10
M06.9	M06.9 Rheumatoid arthritis, unspecified	10

## Sheet: Table S2
Table S2. Quality control of participant data
Number at start of QC	770,171 SNPs
SNPs excluded during QC steps:
HWE < 0.000001	1032 SNPs
Overall MAF <0.01	246,913 SNPs
Sex chromosomes	14,758 SNPs
Number at end of QC	507,468 SNPs
HWE, Hardy-Weinberg equilibrium; MAF, minor allele frequency; QC, quality control
Number at start of QC	Affected (n)	Unaffected control (n)
Sample QC	421	724
Kinship	1	8
Number at end of QC	420	716
Affected, subject affected with hand-OA; Unaffected control, non-OA subject control; QC, quality control

## Sheet: Table S3
Table S3. Genome-wide SNPs cross-platform validation for 33 SNPs nearest CYP26B1 or P-value < 1×10-5
Chr	SNP	Position (bp; hg19)	Allele format	Risk allele	Risk allele OR (95% CI)	RAF controls	RAF cases	P-value	Nearest genea	Sample tested (n)	Concordance rate (%)
2	rs6722569	72206006	TG	G	1.529 (1.260-1.856)	0.6781	0.7631	2.02e-05	CYP26B1b	188	100
2	rs7594591	72211390	TC	C	1.535 (1.264-1.865)	0.6773	0.7632	1.76e-05	CYP26B1	188	100
2	rs35090850	72223865	CT	T	1.572 (1.273-1.941)	0.7325	0.8114	2.71e-05	CYP26B1	188	99.4652
2	rs1517396	72228008	CT	T	1.588 (1.308-1.928)	0.6568	0.7525	3.43e-06	CYP26B1	188	99.4624
2	rs11126353	72233950	AG	G	1.525 (1.254-1.854)	0.6774	0.7621	2.67e-05	CYP26B1	188	98.9305
2	rs4405788	72235688	CT	T	1.512 (1.244-1.837)	0.6785	0.7614	3.53e-05	CYP26B1	188	100
2	rs1543165	72235774	AG	G	1.513 (1.246-1.838)	0.679	0.762	3.37e-05	CYP26B1	188	98.7578
2	rs1543862	72235898	CG	G	1.568 (1.274-1.931)	0.7278	0.8074	3.13e-05	CYP26B1	188	99.4681
2	rs4852832	72236698	TC	C	1.513 (1.246-1.836)	0.6783	0.7613	3.1e-05	CYP26B1	188	100
2	rs6726291	72236979	TC	C	1.521 (1.252-1.848)	0.6793	0.7632	2.65e-05	CYP26B1	188	99.4681
2	rs955788	72237360	AG	G	1.506 (1.240-1.828)	0.6786	0.7608	3.94e-05	CYP26B1	188	100
2	rs883313	72239692	TC	C	1.755 (1.409-2.185)	0.7468	0.8381	6.76e-07	CYP26B1	1136	100
2	rs883312	72239762	CT	T	1.581 (1.305-1.916)	0.662	0.756	3.65e-06	CYP26B1	192	98.44
2	rs883311	72239809	GA	A	1.560 (1.287-1.891)	0.6636	0.7548	7.31e-06	CYP26B1	188	99.4681
2	rs12713768	72240527	AC	C	1.737 (1.393-2.164)	0.7521	0.8405	1.36e-06	CYP26B1	1136	100
2	rs10208040	72241295	TC	C	1.526 (1.258-1.852)	0.6735	0.7589	2.24e-05	CYP26B1	188	99.4624
6	rs1614699	38738748	AT	A	1.809 (1.399-2.338)	0.0949	0.1595	5.3e-06	DNAH8, ZRF1PS	188	100
6	rs1678657	38742793	GT	G	1.809 (1.399-2.338)	0.0949	0.1595	5.3e-06	DNAH8, ZRF1PS	188	100
6	rs1738263	38743252	CT	C	1.809 (1.399-2.338)	0.0949	0.1595	5.3e-06	DNAH8, ZRF1PS	188	96.2567
6	rs12197517	161666190	CG	G	2.327 (1.577-3.432)	0.9088	0.9586	8.5e-06	AGPAT4	188	100
6	rs62437572	161666765	CT	T	2.360 (1.601-3.479)	0.9076	0.9586	5.62e-06	AGPAT4	188	100
6	rs12190239	161669231	GC	C	2.362 (1.602-3.482)	0.9077	0.9587	5.48e-06	AGPAT4	188	100
6	rs112790908	161670764	AAT	AT	2.358 (1.600-3.477)	0.9079	0.9587	5.72e-06	AGPAT4	188	99.4681
6	rs12207205	161671403	AG	G	2.367 (1.606-3.489)	0.9075	0.9587	5.05e-06	AGPAT4	192	100
6	rs73019329	161678741	CT	T	2.353 (1.596-3.469)	0.9083	0.9588	6.06e-06	AGPAT4	192	100
12	rs11108612	97041461	AG	G	1.484 (1.244-1.771)	0.538	0.6335	9.7e-06	CFAP54	188	99.4565
12	rs11108617	97047776	AG	G	1.499 (1.253-1.792)	0.5359	0.6338	7.45e-06	CFAP54	188	99.4318
17	rs76055737	31565197	TC	C	1.947 (1.442-2.629)	0.8632	0.9248	9.89e-06	ASIC2	188	100
17	rs79186365	31565269	AG	G	1.953 (1.447-2.638)	0.8629	0.9248	8.9e-06	ASIC2	188	100
17	rs111761296	34309769	CCCCTT	C	2.124 (1.552-2.905)	0.0579	0.1156	2.56e-06	LYZL6, CCL14, CCL15, CCL16, CCL23	188	99.4318
17	rs76190126	34310256	AC	A	2.024 (1.485-2.758)	0.0601	0.1147	8.39e-06	LYZL6, CCL14, CCL15, CCL16, CCL23	188	99.4382
17	rs10491118	34314886	TG	T	1.971 (1.475-2.636)	0.0677	0.1253	5.99e-06	LYZL6, CCL14, CCL15, CCL16, CCL23	188	99.4652
17	rs12051658	35988597	GA	G	1.988 (1.488-2.656)	0.0677	0.1262	4.35e-06	LYZL6, CCL14, CCL15, CCL16, CCL23	188	100
Chr, chromosome; OR, odds ratio for risk allele; 95% CI, 95% confidence interval; RAF, risk allele frequency; P-value, trend P-value of Cochran-Armitage test; Nearest gene, gene nearest to the SNPs
aNearest gene is within 150 kb away
bSNP located within 200 kb to CYP26B1

## Sheet: Table S4
Table S4. RegulomeDB bioinformatics database search of SNPs within 200kb to CYP26B1
Chr	SNP	Position (bp; hg19)	RegulomeDB Rank	Motif	Chromatin State
					Osteoblast	Subcutaneous abdominal adipose tissue	Adipocyte	Chondrocyte	H1 derived MSCs
2	rs6722569	72206006	7	No data	Repressed PolyComb	Quiescent/Low	Quiescent/Low	Repressed PolyComb	Heterochromatin
2	rs7594591	72211390	5	No data	Repressed PolyComb	Quiescent/Low	Quiescent/Low	Repressed PolyComb	Quiescent
2	rs35090850	72223865	7	No data	Repressed PolyComb	Quiescent/Low	Quiescent/Low	Repressed PolyComb	Quiescent/Low
2	rs1517396	72228008	2b	CDX2, CDX1, CDX4, FOXA1, FOXA2, FOXC1, FOXC2, FOXI1, FOXJ1, FOXJ2, FOXJ3, FOXL1, POU3F2	Repressed PolyComb	Quiescent/Low	Quiescent/Low	Repressed PolyComb	Quiescent/Low
2	rs11126353	72233950	5	No data	Repressed PolyComb	Quiescent/Low	Repressed PolyComb	Repressed PolyComb	Quiescent/Low
2	rs4405788	72235688	4	No data	Repressed PolyComb	Quiescent/Low	Repressed PolyComb	Repressed PolyComb	Quiescent/Low
2	rs1543165	72235774	3a	EGR3, EGR4, TP53	Repressed PolyComb	Quiescent/Low	Repressed PolyComb	Repressed PolyComb	Quiescent/Low
2	rs1543862	72235898	4	No data	Repressed PolyComb	Quiescent/Low	Repressed PolyComb	Repressed PolyComb	Quiescent/Low
2	rs4852832	72236698	4	No data	Repressed PolyComb	Quiescent/Low	Enhancers	Repressed PolyComb	Quiescent/Low
2	rs6726291	72236979	4	No data	Repressed PolyComb	Enhancers	Enhancers	Repressed PolyComb	Quiescent/Low
2	rs955788	72237360	4	No data	Repressed PolyComb	Repressed PolyComb	Enhancers	Repressed PolyComb	Quiescent/Low
2	rs883313	72239692	3a	GABPA	Repressed PolyComb	Repressed PolyComb	Strong transcription	Repressed PolyComb	Quiescent/Low
2	rs883312	72239762	4	No data	Repressed PolyComb	Repressed PolyComb	Strong transcription	Repressed PolyComb	Quiescent/Low
2	rs883311	72239809	4	No data	Repressed PolyComb	Repressed PolyComb	Strong transcription	Repressed PolyComb	Quiescent/Low
2	rs12713768	72240527	2b	ZFX	Repressed PolyComb	Repressed PolyComb	Strong transcription	Repressed PolyComb	Quiescent/Low
2	rs10208040	72241295	5	NR2F2	Repressed PolyComb	Quiescent/Low	Strong transcription	Repressed PolyComb	Quiescent/Low
2	rs191066740	72245915	6	SIX2, SIX3	Repressed PolyComb	Quiescent/Low	Quiescent/Low	Repressed PolyComb	Quiescent/Low
Chr, chromosome; Motif, the consensus sequences of transcription factor (TF) binding sites that include the SNP; Chromatin state, detailed chromatin states around the SNPs in joint-related cell from various bio-samples

## Sheet: Table S5
Table S5. Study population characteristics with age and sex
	Age group (years)
	Total	30–39	40–49	50–59	60–69	70–79	80–89	≥90
Control	716 (100%)	2 (0.3%)	38 (5.3%)	201 (28%)	269 (37.6%)	163 (22.8%)	40 (5.6%)	3 (0.4%)
Female	547 (100%)	2 (0.4%)	33 (6%)	176 (32%)	221 (40.4%)	98 (18%)	16 (3%)	1 (0.2%)
Male	169 (100%)	0 (0%)	5 (3%)	25 (15%)	48 (28%)	65 (39%)	24 (14%)	2 (1%)
Case	420 (100%)	1 (0.2%)	31 (7.4%)	112 (26.7%)	126 (30%)	121 (28.8%)	28 (6.7%)	1 (0.2%)
Female	363 (100%)	1 (0.3%)	28 (7.7%)	106 (29.2%)	114 (31.4%)	97 (26.7%)	16 (4.4%)	1 (0.3%)
Male	57 (100%)	0 (0%)	3 (5%)	6 (11%)	12 (21%)	24 (42%)	12 (21%)	0 (0%)

## Sheet: Table S6
Table S6. Twenty SNPs shared between our Han Chinese hand OA cohort and independent Geisinger hand OA cohort
60k:
SNP	CHR	BP	GENPOS	ALLELE1	ALLELE0	A1FREQ	F_MISS	BETA	SE	P_BOLT_LMM_INF
2:72228008	2	72228008	0	C	T	0.496375	0.0329618	0.00408836	0.00431512	0.34
2:72239692	2	72239692	0	T	C	0.435377	0.00119861	0.00258831	0.00429115	0.55
2:72239762	2	72239762	0	T	C	0.440683	0.00329618	-0.0033395	0.00429262	0.44
2:72239809	2	72239809	0	A	G	0.440545	0.00359583	-0.00353735	0.00429441	0.41
2:72240527	2	72240527	0	A	C	0.442671	0.0293659	-0.00103673	0.00435006	0.81
6:38738748	6	38738748	0	A	T	0.128642	0.00862999	-0.0019641	0.00640881	0.76
6:38742793	6	38742793	0	G	T	0.128935	0.00809061	-0.00202353	0.0064017	0.75
6:38743252	6	38743252	0	C	T	0.0691074	0.00964881	0.00476325	0.00848041	0.57
6:161666190	6	161666190	0	C	G	0.162084	0.0321827	-0.00406882	0.00588644	0.49
6:161666765	6	161666765	0	C	T	0.161706	0.0314036	-0.00433535	0.00588902	0.46
6:161668745	6	161668745	0	A	G	0.161878	0.0279875	-0.00311932	0.00587271	0.6
6:161669231	6	161669231	0	G	C	0.162692	0.0275081	-0.0037098	0.00586387	0.53
6:161671403	6	161671403	0	A	G	0.163852	0.020676	-0.00281685	0.00582157	0.63
6:161678741	6	161678741	0	C	T	0.168719	0.00737145	-0.00132887	0.00571237	0.82
12:97041461	12	97041461	0	A	G	0.170053	0	-0.00264625	0.00568878	0.64
12:97047776	12	97047776	0	A	G	0.170025	0.000539374	-0.00272272	0.00569148	0.63
17:31565197	17	31565197	0	T	C	0.0063987	0.00251708	-0.0205595	0.0267786	0.44
17:31565269	17	31565269	0	A	G	0.00609024	0.00119861	-0.0210785	0.027414	0.44
17:34310256	17	34310256	0	A	C	0.0890893	0.00305645	-0.00791986	0.00752953	0.29
17:34314886	17	34314886	0	T	G	0.0901354	0	-0.0092101	0.00747399	0.22
30k:
SNP	CHR	BP	GENPOS	ALLELE1	ALLELE0	A1FREQ	F_MISS	BETA	SE	P_BOLT_LMM_INF
2:72228008	2	72228008	0	C	T	0.497595	0.0763509	0.00185278	0.00471157	0.69
2:72239692	2	72239692	0	T	C	0.436459	0.00165306	0.00139749	0.00454444	0.76
2:72239762	2	72239762	0	T	C	0.440848	0.0087819	0.00232937	0.00456376	0.61
2:72239809	2	72239809	0	A	G	0.440894	0.00888522	0.00238221	0.00456497	0.6
2:72240527	2	72240527	0	A	C	0.444474	0.0324414	0.0011996	0.00461372	0.79
6:38738748	6	38738748	0	A	T	0.126738	0.0119847	-0.00208772	0.00686099	0.76
6:38742793	6	38742793	0	G	T	0.127064	0.0112615	-0.00203668	0.00685078	0.77
6:38743252	6	38743252	0	C	T	0.067437	0.0164273	-0.00403509	0.00909917	0.66
6:161666190	6	161666190	0	C	G	0.167643	0.0299618	0.00447962	0.00622386	0.47
6:161666765	6	161666765	0	C	T	0.166809	0.0322347	0.0054578	0.00624371	0.38
6:161668745	6	161668745	0	A	G	0.164573	0.0379171	0.00489952	0.00629604	0.44
6:161669231	6	161669231	0	G	C	0.165378	0.0379171	0.00436192	0.00628454	0.49
6:161671403	6	161671403	0	A	G	0.164275	0.0424631	0.0052122	0.00631798	0.41
6:161678741	6	161678741	0	C	T	0.164237	0.0504184	0.00687061	0.00635764	0.28
12:97041461	12	97041461	0	A	G	0.169196	0.00588904	-0.00112462	0.00603187	0.85
12:97047776	12	97047776	0	A	G	0.16923	0.00578572	-0.00123681	0.0060312	0.84
17:31565197	17	31565197	0	T	C	0.00507404	0.00227296	0.0247377	0.0321282	0.44
17:31565269	17	31565269	0	A	G	0.00475698	0.000929848	0.0181991	0.0331516	0.58
17:34310256	17	34310256	0	A	C	0.0845531	0.00475256	0.00734615	0.00819112	0.37
17:34314886	17	34314886	0	T	G	0.0859076	0	0.0072589	0.0080893	0.37

## Sheet: Table S7
Table S7. Comparison of P-value reaching genome-wide significant threshold from previous hand OA studies and our cohort
SNP	Chr	Position	EA	NEA	EAF	P-value	OR	Gene region	EA in our study	NEA in our study	EAF in our study	P-value in our study	OR in our study	Note
Study by Stykarsdottir et al., (2014); Position based on NCBI Build 36/hg18
chr1:63724786	1	63724786	T	TAAGG	0.02	9.6E−10	50.7	LINC00466, FOXD3, ALG6, ITGB3BP, EFCAB7, PGM1, ROR1, DLEU2L	NA	NA	NA	NA	NA
chr1:63807756	1	63807756	A	G	0.02	9.8E−10	50.6	LINC00466, FOXD3, ALG6, ITGB3BP, EFCAB7, PGM1, ROR1, DLEU2L	NA	NA	NA	NA	NA
chr1:63827357	1	63827357	T	C	0.02	3.8E−10	63.7	LINC00466, FOXD3, ALG6, ITGB3BP, EFCAB7, PGM1, ROR1, DLEU2L	NA	NA	NA	NA	NA
rs12907038	15	56031324	G	-	50.73	4e-10	1.51	ALDH1A2	G	C	0.2243	0.05221	1.242
rs10851633	15	56110357	T	C	41.31	2.2e-09	1.48	ALDH1A2	T	C	0.2392	0.02153	1.28
rs35246600	15	56123718	A	T	41.16	2.2e-09	1.48	ALDH1A2	A	T	0.2384	0.0157	1.301
rs4238326	15	56123292	C	T	41.15	2.3e-09	1.48	ALDH1A2	C	T	0.1932	0.03312	1.285
rs11071365	15	56121418	A	G	41.16	2.3e-09	1.48	ALDH1A2	A	G	0.2384	0.01501	1.303
rs12907038	15	56031324	-	C	52.45	2.4e-09	1.48	ALDH1A2	G	C	0.2243	0.05221	1.242
rs4646640	15	56034855	G	C	52.38	2.5e-09	1.48	ALDH1A2	G	C	0.2337	0.0537	1.232
rs3204689	15	56034094	C	G	52.45	2.5e-09	1.48	ALDH1A2	C	G	0.2293	0.05732	1.23
rs7495968	15	56031395	G	C	52.43	3e-09	1.48	ALDH1A2	G	C	0.2238	0.04604	1.25
rs11071366	15	56121536	T	A	41.36	3.2e-09	1.47	ALDH1A2	T	A	0.2384	0.01501	1.303
rs4646638	15	56036075	G	A	52.42	3.6e-09	1.48	ALDH1A2	G	A	0.2429	0.04588	1.236
rs12910113	15	56035665	C	A	52.41	3.6e-09	1.48	ALDH1A2	C	A	0.2367	0.05286	1.232
rs9325	15	56033278	A	T	52.23	4.1e-09	1.47	ALDH1A2	A	T	0.2293	0.05732	1.23
rs4646568	15	56131582	T	C	40.82	4.6e-09	1.47	ALDH1A2	T	C	0.2378	0.01387	1.309
rs8025493	15	56009019	G	A	48.98	4.8e-09	1.47	ALDH1A2	NA	NA	NA	NA	NA
rs4646576	15	56126290	T	A	41.09	4.9e-09	1.46	ALDH1A2	T	A	0.2378	0.01729	1.297
rs11855259	15	56036669	G	C	51.6	9.1e-09	1.46	ALDH1A2	G	C	0.2416	0.0555	1.226
rs35511675	15	56054270	A	T	51.37	9.9e-09	1.46	ALDH1A2	A	T	0.2411	0.03534	1.253
rs7178497	15	56027625	T	C	51.24	1e-08	1.46	ALDH1A2	NA	NA	NA	NA	NA
rs4646611	15	56052375	C	T	51.29	1.1e-08	1.46	ALDH1A2	C	T	0.2399	0.03198	1.258
rs4646612	15	56052369	T	C	51.29	1.1e-08	1.46	ALDH1A2	T	C	0.2361	0.02738	1.269
rs4646593	15	56089759	G	A	51.46	1.1e-08	1.46	ALDH1A2	G	A	0.2386	0.04726	1.236
rs11630835	15	56056754	T	C	51.31	1.2e-08	1.45	ALDH1A2	T	C	0.2411	0.03832	1.248
rs11071356	15	56027810	G	T	51.16	1.2e-08	1.45	ALDH1A2	NA	NA	NA	NA	NA
rs12911071	15	56102140	A	G	51.48	1.2e-08	1.45	ALDH1A2	A	G	0.2386	0.02265	1.277
rs4646563	15	56140627	C	T	51.44	1.2e-08	1.45	ALDH1A2	C	T	0.2383	0.01528	1.305
rs12901462	15	56103779	G	A	51.52	1.3e-08	1.45	ALDH1A2	G	A	0.2386	0.02892	1.264
rs11852540	15	56108756	G	A	51.49	1.3e-08	1.45	ALDH1A2	G	A	0.2392	0.02153	1.28
rs12903551	15	56055664	T	C	51.31	1.3e-08	1.45	ALDH1A2	T	C	0.2411	0.03534	1.253
rs4369598	15	56105895	T	G	51.47	1.3e-08	1.45	ALDH1A2	T	G	0.2386	0.02324	1.276
rs12915901	15	56066724	A	G	51.26	1.3e-08	1.45	ALDH1A2	A	G	0.2411	0.02826	1.266
rs4646586	15	56092636	A	C	51.43	1.3e-08	1.45	ALDH1A2	A	C	0.2386	0.03927	1.247
chr15:56103658	15	56103658	G	GGAAGA	51.4	1.4e-08	1.45	ALDH1A2	G	GGAAGA	0.2386	0.02574	1.27
rs3784262	15	56040398	C	T	51.28	1.4e-08	1.45	ALDH1A2	C	T	0.244	0.03217	1.255
rs12903474	15	56064039	A	C	51.35	1.4e-08	1.45	ALDH1A2	A	C	0.2411	0.03344	1.256
rs12148093	15	56116232	T	A	51.49	1.4e-08	1.45	ALDH1A2	NA	NA	NA	NA	NA
rs4646627	15	56042597	G	A	51.29	1.5e-08	1.45	ALDH1A2	G	A	0.2405	0.04066	1.243
rs4646629	15	56042507	G	A	51.3	1.5e-08	1.45	ALDH1A2	G	A	0.2405	0.04066	1.243
rs4646622	15	56044491	G	A	51.33	1.5e-08	1.45	ALDH1A2	G	A	0.2411	0.03587	1.251
chr15:56054709	15	56054709	A	ACATA	51.29	1.6e-08	1.45	ALDH1A2	NA	NA	NA	NA	NA
rs1372368	15	56084655	T	C	51.42	1.7e-08	1.45	ALDH1A2	T	C	0.2386	0.03927	1.247
rs7164408	15	56046628	G	A	51.31	1.7e-08	1.45	ALDH1A2	G	A	0.2387	0.04593	1.238
rs10851630	15	56029440	T	C	51.23	1.8e-08	1.45	ALDH1A2	NA	NA	NA	NA	NA
rs12148907	15	56083742	A	T	51.43	1.8e-08	1.45	ALDH1A2	A	T	0.2386	0.04251	1.243
rs74655564	15	56112804	C	G	44.62	1.9e-08	1.44	ALDH1A2	C	G	0.2392	0.02153	1.28
rs17820823	15	56026650	G	A	52.83	1.9e-08	1.45	ALDH1A2	NA	NA	NA	NA	NA
rs7170896	15	56039685	A	T	51.3	2.1e-08	1.44	ALDH1A2	A	T	0.2411	0.04673	1.236
rs12910752	15	56101971	A	G	51.48	2.5e-08	1.44	ALDH1A2	A	G	0.2386	0.02265	1.277
rs7165247	15	56039078	C	T	51.27	2.6e-08	1.44	ALDH1A2	C	T	0.2411	0.04673	1.236
rs10851631	15	56029485	T	C	51.22	2.8e-08	1.44	ALDH1A2	T	C	0.2254	0.03246	1.27
rs4646619	15	56045634	G	A	51.22	3e-08	1.44	ALDH1A2	G	A	0.2411	0.03397	1.254
rs34871384	15	56067166	A	C	51.32	3.1e-08	1.44	ALDH1A2	A	C	0.2411	0.02826	1.266
rs4646636	15	56038326	G	A	52.27	3.6e-08	1.44	ALDH1A2	G	A	0.2411	0.04673	1.236
rs1579744	15	56016815	G	A	53.83	3.7e-08	1.44	ALDH1A2	NA	NA	NA	NA	NA
rs11852835	15	56015891	G	A	53.94	4.2e-08	1.44	ALDH1A2	NA	NA	NA	NA	NA
Study by den Hollander et al., (2017); Position based on GRCh37/hg19
rs1494593	5	23574856	T	C	0.88	2.28e-05		PRDM9--[]---C5orf17	NA	NA	NA	NA	NA
rs114370021	5	16739853§	A	G	0.27	0.000696		[TENM2]	A	G	0.3184	0.4882	1.067
rs7770034	6	44447004	A	G	0.48	1.01e-06		CDC5L --[]---SUPT3H	A	G	0.1293	0.111	1.237
6:132063842:D	6	132063842	D	I	0.27	3.79e-07		[ENPP3]	NA	NA	NA	NA	NA
11:90657297:D	11	90657297	D	I	0.11	2.91e-06		DISC1FP1-[]----FAT3	T	TAGAA	0.09615	0.09245	1.298
rs4764133	12	15064363	T	C	0.39	1.8e-15		MGP--[]- ERP27	T	C	0.1193	0.001982	1.554
rs7139060	12	28693144	A	G	0.67	1.47e-06		[CCDC91]	NA	NA	NA	NA	NA
rs1950427	14	25955502	T	C	0.12	0.00018		STXBP6---[]---NOVA1	T	C	0.4535	0.9349	1.007
rs6108226	20	8960884	T	C	0.77	1.14e-05		PLCB1--[]--PLCB4	T	C	0.6714	0.9317	0.992063
Study by Boer et al., (2021); Position based on GRCh37/hg19
Novel loci
rs11588154	1	55301936	T	G	0.17	6.08e-10	0.83	C1orf177	NA	NA	NA	NA	NA	FingerOA
rs11588850	1	227927242	A	G	0.82	3.53e-10	0.87	SNAP47	NA	NA	NA	NA	NA	ThumbOA
rs1560080	5	115338732	A	G	0.83	9.61e-09	0.91	AQPEP	G	A	0.2198	0.4106	1.092	HandOA
rs10062749	5	141805088	T	G	0.27	2.04e-09	1.08	AC005592.2	G	T	0.1966	0.9573	1.303	HandOA
rs9396861	6	18404133	A	C	0.61	9.35e-11	1.13	RNF144B	NA	NA	NA	NA	NA	FingerOA
rs3993110	11	12794530	A	C	0.61	3.75e-11	1.09	TEAD1	NA	NA	NA	NA	NA	HandOA
rs8112559	19	46390455	C	G	0.89	7.32e-11	1.13	IRF2BP1	NA	NA	NA	NA	NA	HandOA
Previously reported loci
rs7294636	12	15054016	A	G	0.37	2.99e-16	1.16	C12orf60	A	G	0.1444	0.006765	1.421	FingerOA
rs11071366	15	58334244	A	T	0.61	4.88e-17	0.9	ALDH1A2	A	T	0.7616	0.01501	0.76746	HandOA
§corrected from 167398535
‡SNP location represented by [], if the SNP is localised intergenic the dashes denotes the distance, -≤10 kb, --≤100 kb, ---≤1000 kb, ----≤1 Mkb, -----≥1Mkb.
EA, Effect allele; NEA, Non-effect allele; EAF, Effect allele frequency; NA, SNP not present or failing QC in current GWAS; Yellow highlighted, SNPs with P < 0.05 in our study

## Sheet: Table S8
Table S8. P-value of SNPs rs12713768 and rs883313 associated with hip and knee OA (n=289)
SNP	Chr	Position (bp)	P	AFF	UNAFF	A1	A2	TEST	CHISQ	DF	probtrend	log_trend
rs883313	2	72239692	0.3113	135/443	366/1068	T	C	TREND	1.025	1	0.3113	0.50682
rs12713768	2	72240527	0.3946	134/444	362/1086	A	C	TREND	0.7247	1	0.3946	0.40384
SNP, single-nucleotide polymorphism; Chr, chromosome; P, P-value; A1, minor allele; A2, major allele; CHISQ, Chi-square test statistics

## Sheet: Table S9
Table S9. Comparison of risk allele frequency of SNPs rs12713768 and rs883313 associated with hip/knee OA, hand OA, and 1000 Genomes Project Phase 3
SNP	Sample Size (N)	Alelle frequency (%)
		Risk allele	Alt Allele
rs883313		C	T
Hip/knee OA affected subjects	289	0.766436	0.234
Hand OA affected subjects	420	0.8381	0.1619
1000 Genomes Project Phase 3	5008	0.662	0.338
East Asian (1000 Genomes Project Phase 3)	1008	0.761	0.239
rs12713768		C	A
Hip/knee OA	289	0.768166	0.232
Hand OA	420	0.8405	0.1595
1000 Genomes Project Phase 3	5008	0.614	0.386
East Asian (1000 Genomes Project Phase 3)	1008	0.766	0.234

[truncated: 2 more sheets: Table S10, Table S11]
